# Supplementary material
Source: PubMed Central journal article supplement (PMC6977206)
Supplement: ao9b03967_si_001.pdf [file ao9b03967_si_001.pdf]

## Supporting Information

### A Theoretical Study of the Kinetics of the Gas-Phase Reaction between Phenyl and Amino Radicals

Tien V. Pham,<sup>1\*</sup> Hoang T. Tue Trang<sup>2</sup>, Trinh Le Huyen<sup>3</sup>, Tue Ngoc Nguyen<sup>1</sup>

<sup>1</sup> School of Chemical Engineering, Hanoi University of Science and Technology, Hanoi City 100000, Vietnam

<sup>2</sup> Department of Chemistry, Hanoi Architectural University, Hanoi City 100000, Vietnam

<sup>3</sup> Department of Applied Chemistry, National Chiao Tung University, Hsinchu 30010, Taiwan

#### Calculate the rate constants with the VTST

For the barrierless transition state processes,  $C_6H_5 + NH_2 \rightarrow C_6H_5NH_2$ , the VRC-TST method was employed to calculate rate constants based on the evaluation of the maximum free energy of activation ( $\Delta G^\ddagger$ ) at each temperature along the reaction path. The potential energy surface for the dissociation of  $C_6H_5NH_2$  was scanned at the B3LYP/6-311++G(3df,2p) level of theory. In which, the C-N bond distance of  $C_6H_5NH_2$  was changed from 4.0 Å to its equilibrium value, 1.395 with an interval of 0.1 Å. The geometric structures with the fixed bond distance of C-N were optimized at the same level above to obtain the rotational and vibrational parameters. The B3LYP calculated energy at each point along the reaction path was employed to evaluate the Morse potential energy function and then scaled to match the dissociation energy estimated at the CCSD(T) level. The Morse potential energy  $V(R)$  utilized to describe the minimum potential energy along the reaction path is presented as follows

$$V(R) = D_e \{1 - \exp[-\beta(R - R_e)]\}^2$$

where  $D_e$  is the bonding energy excluding zero-point vibrational energy (ZPVE) for an association reaction,  $R$  is the bond distance between two bonding atoms (i.e., in the present work C-N),  $R_e$  is the equilibrium value of  $R$  at the stable intermediate structure.

The predicted moments of inertia, the vibrational frequencies, and the dissociation energy as a function of R were used to find  $\Delta G^{\ddagger}_{\max}$  at each temperature in the range of 300 - 2000 K. All the molecular parameters corresponding to the structure with a  $\Delta G^{\ddagger}_{\max}$  for each temperature were then used for the RRKM calculation.

**Table S1.** Frequencies of reactants, intermediates, transition states and products of the  $C_6H_5 + NH_2$  reaction at the B3LYP/6-311++G(3df,2p) method.

|                               |         |         |         |
|-------------------------------|---------|---------|---------|
| C <sub>6</sub> H <sub>5</sub> | 401.11  | 991.22  | 1464.31 |
|                               | 427.65  | 1000.83 | 1472.59 |
|                               | 602.41  | 1017.04 | 1570.10 |
|                               | 620.84  | 1052.31 | 1627.01 |
|                               | 667.49  | 1072.94 | 3154.12 |
|                               | 724.33  | 1177.05 | 3159.67 |
|                               | 817.45  | 1177.41 | 3173.33 |
|                               | 899.04  | 1303.34 | 3175.09 |
|                               | 969.56  | 1326.02 | 3185.97 |
| NH <sub>2</sub>               | 1530.82 | 3363.96 | 3452.32 |
| IS1                           | 219.40  | 889.61  | 1501.16 |
|                               | 292.73  | 973.88  | 1531.71 |
|                               | 383.30  | 983.66  | 1623.73 |
|                               | 417.60  | 990.86  | 1642.39 |
|                               | 502.26  | 1047.34 | 1659.08 |
|                               | 535.38  | 1061.82 | 3150.32 |
|                               | 570.08  | 1133.52 | 3153.08 |
|                               | 633.86  | 1179.88 | 3168.64 |
|                               | 697.57  | 1201.25 | 3174.07 |
|                               | 762.63  | 1292.30 | 3192.28 |
|                               | 824.68  | 1343.59 | 3568.99 |
| 829.39                        | 1369.81 | 3665.82 |         |
| IS2                           | 121.67  | 952.73  | 1442.13 |
|                               | 321.85  | 965.83  | 1445.25 |
|                               | 376.07  | 987.99  | 1634.74 |
|                               | 433.97  | 1015.49 | 1661.74 |
|                               | 510.11  | 1027.94 | 1717.86 |
|                               | 570.31  | 1118.98 | 2975.77 |
|                               | 592.07  | 1189.65 | 2978.92 |
|                               | 735.75  | 1207.93 | 3139.08 |
|                               | 781.15  | 1208.22 | 3150.11 |
|                               | 835.75  | 1355.91 | 3160.43 |
|                               | 884.01  | 1382.98 | 3183.32 |

|        |         |         |         |
|--------|---------|---------|---------|
|        | 913.22  | 1421.82 | 3438.23 |
| IS3    | 108.77  | 875.33  | 1401.79 |
|        | 148.04  | 926.17  | 1432.61 |
|        | 358.27  | 957.30  | 1528.76 |
|        | 372.89  | 983.70  | 1623.99 |
|        | 406.26  | 1013.10 | 1626.80 |
|        | 438.19  | 1078.70 | 2928.14 |
|        | 510.66  | 1124.83 | 2974.50 |
|        | 570.57  | 1173.00 | 3122.48 |
|        | 593.73  | 1191.73 | 3155.72 |
|        | 689.00  | 1276.98 | 3176.15 |
|        | 768.32  | 1307.85 | 3556.45 |
|        | 817.29  | 1320.36 | 3670.89 |
| IS4    | 122.20  | 851.81  | 1380.19 |
|        | 253.85  | 904.34  | 1428.65 |
|        | 328.20  | 957.17  | 1599.95 |
|        | 363.24  | 977.64  | 1655.56 |
|        | 442.55  | 996.67  | 1828.70 |
|        | 506.71  | 1095.84 | 2982.92 |
|        | 538.93  | 1137.15 | 3146.25 |
|        | 580.15  | 1149.71 | 3148.15 |
|        | 717.41  | 1169.62 | 3155.09 |
|        | 759.81  | 1247.68 | 3171.26 |
|        | 789.93  | 1277.55 | 3491.78 |
| 819.20 | 1348.31 | 3572.30 |         |
| IS5    | 124.34  | 896.44  | 1430.35 |
|        | 252.16  | 919.02  | 1461.19 |
|        | 268.89  | 947.75  | 1597.52 |
|        | 397.98  | 961.22  | 1636.73 |
|        | 413.70  | 991.60  | 1684.79 |
|        | 474.63  | 1046.24 | 2993.12 |
|        | 544.97  | 1150.51 | 3046.26 |
|        | 582.29  | 1173.91 | 3103.46 |
|        | 630.85  | 1283.98 | 3150.41 |
|        | 702.16  | 1300.53 | 3179.77 |
|        | 801.54  | 1380.68 | 3568.90 |
| 859.53 | 1398.68 | 3706.79 |         |
| IS6    | 90.51   | 848.27  | 1366.97 |
|        | 206.43  | 922.79  | 1413.76 |
|        | 282.84  | 962.43  | 1509.26 |
|        | 345.30  | 974.24  | 1579.22 |
|        | 389.29  | 1016.13 | 1628.99 |
|        | 447.29  | 1064.49 | 2756.03 |
|        | 539.08  | 1112.26 | 3134.51 |
|        | 651.33  | 1151.56 | 3144.74 |
|        | 712.16  | 1180.93 | 3155.83 |
|        | 774.77  | 1226.37 | 3173.46 |

|      |        |         |         |
|------|--------|---------|---------|
|      | 802.34 | 1269.70 | 3482.26 |
|      | 836.46 | 1315.92 | 3571.10 |
| IS7  | 163.19 | 845.82  | 1415.19 |
|      | 297.89 | 881.71  | 1445.73 |
|      | 339.92 | 923.79  | 1580.74 |
|      | 390.70 | 987.16  | 1656.72 |
|      | 423.37 | 1030.67 | 1764.00 |
|      | 438.39 | 1106.07 | 2984.10 |
|      | 470.00 | 1157.97 | 3041.37 |
|      | 552.31 | 1181.33 | 3134.59 |
|      | 614.82 | 1261.75 | 3142.44 |
|      | 671.95 | 1301.96 | 3148.23 |
|      | 750.71 | 1312.20 | 3583.91 |
|      | 800.06 | 1382.40 | 3689.81 |
| IS8  | 74.75  | 885.51  | 1401.34 |
|      | 191.08 | 930.56  | 1414.96 |
|      | 260.26 | 941.82  | 1538.54 |
|      | 372.01 | 1012.56 | 1606.15 |
|      | 391.61 | 1030.90 | 1658.72 |
|      | 444.32 | 1083.74 | 2945.52 |
|      | 520.02 | 1131.75 | 3025.20 |
|      | 547.81 | 1179.53 | 3104.05 |
|      | 590.39 | 1254.80 | 3121.43 |
|      | 785.91 | 1270.96 | 3158.96 |
|      | 791.02 | 1348.44 | 3584.49 |
|      | 807.73 | 1363.74 | 3703.05 |
| IS9  | 199.03 | 821.26  | 1411.06 |
|      | 210.16 | 871.81  | 1454.44 |
|      | 311.63 | 935.05  | 1626.11 |
|      | 371.29 | 949.02  | 1656.30 |
|      | 387.94 | 998.34  | 1812.41 |
|      | 487.02 | 1125.52 | 2964.08 |
|      | 524.58 | 1154.25 | 3029.87 |
|      | 575.08 | 1168.24 | 3139.50 |
|      | 640.72 | 1225.09 | 3146.28 |
|      | 724.28 | 1272.40 | 3156.40 |
|      | 754.67 | 1302.49 | 3556.43 |
|      | 764.03 | 1378.02 | 3651.84 |
| IS10 | 77.57  | 879.63  | 1418.99 |
|      | 230.00 | 889.31  | 1464.33 |
|      | 314.79 | 951.52  | 1494.42 |
|      | 319.37 | 973.57  | 1654.70 |
|      | 386.99 | 989.77  | 1665.44 |
|      | 513.08 | 1055.90 | 2965.07 |
|      | 528.07 | 1164.44 | 2967.93 |
|      | 580.71 | 1177.87 | 3045.24 |
|      | 596.84 | 1268.32 | 3123.96 |

|      |        |         |         |
|------|--------|---------|---------|
|      | 795.85 | 1314.36 | 3151.94 |
|      | 804.41 | 1344.50 | 3586.94 |
|      | 828.12 | 1367.05 | 3703.77 |
| IS11 | 186.39 | 950.75  | 1464.76 |
|      | 205.50 | 985.06  | 1577.66 |
|      | 325.81 | 1003.51 | 1592.31 |
|      | 409.44 | 1020.73 | 1625.91 |
|      | 454.47 | 1030.47 | 1630.69 |
|      | 499.84 | 1052.28 | 3107.00 |
|      | 615.95 | 1139.78 | 3125.80 |
|      | 701.42 | 1174.43 | 3142.51 |
|      | 737.65 | 1277.81 | 3177.58 |
|      | 740.08 | 1330.47 | 3196.57 |
|      | 876.24 | 1362.17 | 3415.16 |
|      | 938.78 | 1439.86 | 3475.53 |
| IS12 | 107.73 | 957.06  | 1444.98 |
|      | 186.34 | 974.29  | 1539.59 |
|      | 313.05 | 981.64  | 1595.75 |
|      | 375.84 | 1008.72 | 1641.91 |
|      | 421.48 | 1010.66 | 1659.02 |
|      | 499.20 | 1083.99 | 2959.89 |
|      | 595.80 | 1113.44 | 3080.74 |
|      | 687.34 | 1182.09 | 3125.73 |
|      | 729.57 | 1287.06 | 3155.54 |
|      | 733.49 | 1328.68 | 3370.68 |
|      | 825.63 | 1412.11 | 3444.85 |
|      | 896.81 | 1420.53 | 3458.96 |
| IS13 | 64.06  | 951.83  | 1431.18 |
|      | 272.37 | 967.08  | 1448.03 |
|      | 438.63 | 993.86  | 1609.60 |
|      | 449.16 | 1003.68 | 1652.93 |
|      | 488.48 | 1008.85 | 1698.60 |
|      | 552.90 | 1119.42 | 2980.31 |
|      | 589.99 | 1194.73 | 3055.81 |
|      | 707.70 | 1199.59 | 3147.34 |
|      | 757.51 | 1204.37 | 3156.50 |
|      | 793.53 | 1334.11 | 3167.55 |
|      | 914.20 | 1367.73 | 3182.14 |
|      | 939.13 | 1409.58 | 3437.17 |
| IS14 | 170.13 | 901.58  | 1410.57 |
|      | 245.30 | 924.50  | 1477.10 |
|      | 268.01 | 937.29  | 1484.81 |
|      | 360.67 | 970.79  | 1606.14 |
|      | 440.25 | 999.90  | 1642.78 |
|      | 514.93 | 1037.72 | 3149.30 |
|      | 620.16 | 1073.11 | 3150.49 |
|      | 620.24 | 1141.37 | 3179.52 |

|      |        |         |         |
|------|--------|---------|---------|
|      | 652.18 | 1157.64 | 3182.37 |
|      | 779.45 | 1209.06 | 3393.72 |
|      | 792.49 | 1286.79 | 3486.42 |
|      | 817.08 | 1321.98 | 3493.37 |
| IS16 | 75.63  | 864.13  | 1379.45 |
|      | 118.57 | 888.63  | 1444.72 |
|      | 215.68 | 970.90  | 1521.31 |
|      | 295.32 | 996.87  | 1640.71 |
|      | 378.00 | 1018.11 | 1665.90 |
|      | 499.28 | 1116.25 | 2945.46 |
|      | 522.44 | 1126.96 | 2951.17 |
|      | 607.67 | 1172.98 | 3102.24 |
|      | 630.81 | 1230.34 | 3122.01 |
|      | 711.02 | 1247.48 | 3132.32 |
|      | 773.34 | 1284.40 | 3553.48 |
|      | 838.93 | 1333.13 | 3648.60 |
| IS18 | 97.75  | 919.11  | 1416.50 |
|      | 154.27 | 932.22  | 1453.40 |
|      | 259.61 | 952.33  | 1491.11 |
|      | 312.03 | 997.65  | 1614.70 |
|      | 381.90 | 1020.80 | 1655.79 |
|      | 463.86 | 1065.29 | 2982.66 |
|      | 494.83 | 1196.31 | 3010.73 |
|      | 565.33 | 1202.34 | 3050.99 |
|      | 596.71 | 1298.25 | 3110.26 |
|      | 732.78 | 1317.69 | 3135.50 |
|      | 781.67 | 1394.27 | 3587.42 |
|      | 890.93 | 1409.61 | 3703.29 |
| IS19 | 153.71 | 901.20  | 1415.24 |
|      | 225.15 | 933.45  | 1438.44 |
|      | 360.30 | 936.64  | 1546.22 |
|      | 386.91 | 1004.68 | 1587.56 |
|      | 421.30 | 1017.98 | 1628.96 |
|      | 439.05 | 1121.76 | 2952.20 |
|      | 526.94 | 1148.12 | 2958.95 |
|      | 570.43 | 1157.93 | 3115.87 |
|      | 577.87 | 1237.55 | 3121.25 |
|      | 721.10 | 1291.67 | 3148.36 |
|      | 788.16 | 1353.80 | 3549.98 |
|      | 805.02 | 1383.46 | 3665.61 |
| IS20 | 122.74 | 871.68  | 1432.95 |
|      | 296.52 | 910.05  | 1453.27 |
|      | 312.92 | 949.16  | 1601.58 |
|      | 327.75 | 979.20  | 1630.84 |
|      | 410.48 | 1009.56 | 1676.01 |
|      | 483.38 | 1051.92 | 2955.63 |
|      | 557.79 | 1155.63 | 3001.30 |

|      |          |         |         |
|------|----------|---------|---------|
|      | 589.98   | 1183.99 | 3091.08 |
|      | 637.18   | 1302.72 | 3127.57 |
|      | 756.56   | 1323.66 | 3162.56 |
|      | 783.11   | 1356.20 | 3561.32 |
|      | 805.97   | 1410.90 | 3700.16 |
| T1/2 | -1718.29 | 927.18  | 1373.11 |
|      | 316.91   | 948.42  | 1434.17 |
|      | 398.32   | 960.18  | 1443.16 |
|      | 441.21   | 978.84  | 1484.63 |
|      | 505.71   | 1007.13 | 1497.56 |
|      | 563.48   | 1052.76 | 1584.77 |
|      | 628.18   | 1107.50 | 3165.90 |
|      | 637.77   | 1145.79 | 3174.08 |
|      | 668.26   | 1157.33 | 3183.63 |
|      | 755.25   | 1264.88 | 3203.60 |
|      | 829.24   | 1315.50 | 3205.25 |
|      | 901.74   | 1332.97 | 3418.24 |
| T1/3 | -388.36  | 866.88  | 1405.09 |
|      | 110.05   | 918.29  | 1440.95 |
|      | 367.75   | 934.82  | 1542.90 |
|      | 382.75   | 995.89  | 1623.61 |
|      | 401.92   | 999.88  | 1632.03 |
|      | 464.79   | 1035.56 | 2603.97 |
|      | 512.01   | 1124.52 | 3095.04 |
|      | 540.49   | 1181.88 | 3123.17 |
|      | 604.87   | 1200.74 | 3163.83 |
|      | 655.80   | 1245.55 | 3183.15 |
|      | 718.60   | 1298.12 | 3560.86 |
|      | 820.72   | 1361.77 | 3677.92 |
| T1/4 | -1421.84 | 808.38  | 1351.62 |
|      | 232.35   | 841.80  | 1423.58 |
|      | 315.20   | 929.08  | 1483.46 |
|      | 338.82   | 943.07  | 1594.02 |
|      | 380.92   | 1023.81 | 1643.85 |
|      | 507.58   | 1053.11 | 1770.58 |
|      | 547.39   | 1075.61 | 3122.95 |
|      | 570.28   | 1134.17 | 3161.44 |
|      | 645.94   | 1219.23 | 3178.05 |
|      | 689.61   | 1255.87 | 3195.00 |
|      | 718.93   | 1309.07 | 3543.65 |
|      | 792.61   | 1332.26 | 3641.33 |
| T1/6 | -264.12  | 901.96  | 1413.48 |
|      | 119.19   | 934.58  | 1442.19 |
|      | 248.02   | 1001.61 | 1523.37 |
|      | 356.17   | 1011.67 | 1630.22 |
|      | 388.59   | 1036.98 | 1666.60 |
|      | 512.60   | 1071.80 | 2681.53 |

|      |          |         |         |
|------|----------|---------|---------|
|      | 557.47   | 1090.77 | 3117.55 |
|      | 601.17   | 1164.49 | 3139.49 |
|      | 647.55   | 1198.94 | 3167.50 |
|      | 746.15   | 1203.39 | 3185.96 |
|      | 848.78   | 1249.50 | 3502.64 |
|      | 890.20   | 1276.61 | 3568.13 |
| T1P8 | -1512.65 | 897.83  | 1319.95 |
|      | 265.06   | 922.00  | 1506.63 |
|      | 318.05   | 930.08  | 1530.91 |
|      | 349.47   | 952.01  | 1533.23 |
|      | 404.41   | 955.32  | 1570.84 |
|      | 428.14   | 996.79  | 1803.28 |
|      | 545.05   | 1010.58 | 3147.08 |
|      | 699.69   | 1045.71 | 3148.24 |
|      | 725.73   | 1139.71 | 3175.39 |
|      | 774.13   | 1142.94 | 3178.63 |
|      | 792.62   | 1219.03 | 3518.36 |
|      | 833.42   | 1291.30 | 3616.45 |
| T1/7 | -1577.88 | 827.01  | 1363.26 |
|      | 228.01   | 906.77  | 1437.07 |
|      | 325.98   | 916.26  | 1506.66 |
|      | 363.71   | 948.53  | 1582.22 |
|      | 398.03   | 1050.68 | 1649.07 |
|      | 447.98   | 1055.56 | 1764.47 |
|      | 498.65   | 1071.52 | 3043.20 |
|      | 536.18   | 1121.56 | 3123.88 |
|      | 589.22   | 1232.35 | 3148.40 |
|      | 648.26   | 1259.25 | 3166.12 |
|      | 716.95   | 1273.51 | 3562.28 |
|      | 785.87   | 1330.22 | 3667.05 |
| T1/8 | -1034.40 | 815.18  | 1421.69 |
|      | 164.08   | 900.74  | 1464.35 |
|      | 358.40   | 985.70  | 1545.09 |
|      | 381.41   | 1010.91 | 1624.29 |
|      | 390.60   | 1019.72 | 1656.92 |
|      | 410.92   | 1039.51 | 2218.03 |
|      | 454.50   | 1112.88 | 3075.64 |
|      | 530.64   | 1190.70 | 3126.58 |
|      | 613.42   | 1207.63 | 3143.10 |
|      | 680.89   | 1247.51 | 3158.98 |
|      | 783.31   | 1314.01 | 3582.87 |
|      | 807.49   | 1371.02 | 3689.88 |



|       |           |           |           |
|-------|-----------|-----------|-----------|
| T1/9  | -1491.48  | 811.76    | 1346.57   |
|       | 229.22    | 835.62    | 1435.08   |
|       | 323.03    | 889.04    | 1497.32   |
|       | 348.98    | 988.56    | 1592.20   |
|       | 400.64    | 1051.37   | 1655.34   |
|       | 459.48    | 1065.72   | 1756.34   |
|       | 503.15    | 1082.24   | 3109.45   |
|       | 565.21    | 1118.08   | 3134.65   |
|       | 593.45    | 1219.77   | 3155.59   |
|       | 641.08    | 1233.37   | 3161.50   |
|       | 697.72    | 1269.05   | 3584.77   |
|       | 784.70    | 1312.37   | 3681.69   |
| T1/10 | -1088.03  | 846.75    | 1425.78   |
|       | 160.61    | 888.84    | 1483.67   |
|       | 337.44    | 967.47    | 1518.47   |
|       | 348.74    | 982.26    | 1639.91   |
|       | 384.67    | 1000.48   | 1657.47   |
|       | 442.29    | 1042.50   | 2185.36   |
|       | 509.07    | 1110.65   | 3091.01   |
|       | 532.22    | 1188.84   | 3108.57   |
|       | 606.56    | 1228.34   | 3142.10   |
|       | 656.47    | 1279.87   | 3162.78   |
|       | 758.28    | 1311.89   | 3589.57   |
|       | 812.90    | 1374.95   | 3698.74   |
| T1/11 | 1288.0171 | 199.8175  | 351.6162  |
|       | 425.51120 | 454.7764  | 492.9765  |
|       | 596.08000 | 637.6614  | 711.1373  |
|       | 749.47660 | 818.6959  | 882.6828  |
|       | 947.99080 | 1002.8476 | 1003.2515 |
|       | 1037.7133 | 1048.7871 | 1099.3419 |
|       | 1103.3918 | 1147.5327 | 1178.1568 |
|       | 1283.2238 | 1320.7875 | 1414.8575 |
|       | 1451.4256 | 1468.5229 | 1580.2717 |
|       | 1589.4789 | 1604.6653 | 1966.6625 |
|       | 3128.8995 | 3148.9076 | 3155.5288 |
|       | 3178.5280 | 3423.3497 | 3510.6805 |
| T1/13 | -2043.17  | 875.28    | 1402.48   |
|       | 206.88    | 956.64    | 1457.04   |
|       | 360.56    | 993.24    | 1522.72   |
|       | 448.17    | 996.20    | 1539.56   |
|       | 506.80    | 1002.03   | 1618.61   |
|       | 562.10    | 1045.05   | 1776.81   |
|       | 611.45    | 1119.29   | 3071.64   |
|       | 638.62    | 1168.95   | 3152.93   |
|       | 652.78    | 1181.55   | 3160.91   |
|       | 757.42    | 1200.87   | 3175.83   |
|       | 786.38    | 1314.15   | 3186.33   |

|       |                                                                                                                       |                                                                                                                              |                                                                                                                                  |
|-------|-----------------------------------------------------------------------------------------------------------------------|------------------------------------------------------------------------------------------------------------------------------|----------------------------------------------------------------------------------------------------------------------------------|
|       | 822.37                                                                                                                | 1372.23                                                                                                                      | 3435.17                                                                                                                          |
| T1/16 | -410.17<br>190.52<br>242.05<br>312.68<br>380.80<br>474.49<br>512.02<br>566.11<br>623.50<br>646.48<br>776.03<br>820.38 | 863.01<br>884.10<br>928.54<br>998.29<br>1019.61<br>1038.20<br>1124.25<br>1178.97<br>1228.17<br>1247.64<br>1287.59<br>1367.18 | 1397.38<br>1465.70<br>1536.13<br>1641.16<br>1663.21<br>2566.82<br>3094.50<br>3108.79<br>3129.48<br>3145.40<br>3563.58<br>3661.80 |
| T1/18 | -976.36<br>190.71<br>255.29<br>354.84<br>372.12<br>437.74<br>569.47<br>625.49<br>643.49<br>689.29<br>739.98<br>747.69 | 810.33<br>874.62<br>924.98<br>955.76<br>991.99<br>1049.82<br>1080.07<br>1103.05<br>1147.97<br>1219.45<br>1225.37<br>1326.55  | 1350.45<br>1396.41<br>1567.60<br>1631.73<br>1672.51<br>1939.01<br>3092.65<br>3197.76<br>3219.88<br>3224.46<br>3533.29<br>3628.66 |
| T1/19 | -802.57<br>185.42<br>315.05<br>346.22<br>441.44<br>491.05<br>521.54<br>587.27<br>641.99<br>702.99<br>727.29<br>789.02 | 839.37<br>858.70<br>887.15<br>901.86<br>980.64<br>1047.08<br>1085.67<br>1094.17<br>1199.04<br>1247.17<br>1265.00<br>1317.93  | 1358.73<br>1380.59<br>1565.73<br>1630.39<br>1670.49<br>2071.20<br>3093.73<br>3194.88<br>3209.79<br>3221.81<br>3554.48<br>3650.54 |
| T1/20 | -1605.02<br>216.82<br>298.31                                                                                          | 848.94<br>893.63<br>924.77                                                                                                   | 1360.99<br>1441.08<br>1487.06                                                                                                    |

|       |          |         |         |
|-------|----------|---------|---------|
|       | 362.30   | 956.47  | 1606.04 |
|       | 375.63   | 1013.93 | 1649.06 |
|       | 499.75   | 1043.03 | 1737.75 |
|       | 504.37   | 1064.95 | 3089.12 |
|       | 544.11   | 1146.94 | 3108.78 |
|       | 581.01   | 1225.42 | 3152.94 |
|       | 631.26   | 1248.51 | 3172.11 |
|       | 735.72   | 1303.34 | 3563.87 |
|       | 786.13   | 1328.00 | 3677.02 |
| T1P1  | -2063.38 | 803.50  | 1353.25 |
|       | 261.96   | 861.91  | 1354.69 |
|       | 320.39   | 876.55  | 1402.98 |
|       | 457.96   | 947.49  | 1496.51 |
|       | 516.11   | 978.67  | 1560.26 |
|       | 526.04   | 1006.03 | 1587.24 |
|       | 572.68   | 1083.36 | 1649.14 |
|       | 581.95   | 1115.83 | 3155.57 |
|       | 637.08   | 1148.91 | 3169.79 |
|       | 674.92   | 1245.34 | 3179.74 |
|       | 739.82   | 1275.88 | 3197.21 |
|       | 785.44   | 1322.42 | 3437.05 |
| T1P2  | -1876.21 | 800.36  | 1347.58 |
|       | 198.11   | 820.58  | 1394.21 |
|       | 278.60   | 884.39  | 1464.61 |
|       | 375.86   | 909.86  | 1499.50 |
|       | 424.19   | 967.10  | 1540.28 |
|       | 489.80   | 1029.97 | 1687.52 |
|       | 547.71   | 1036.24 | 3166.51 |
|       | 601.55   | 1074.68 | 3168.52 |
|       | 657.10   | 1086.27 | 3183.14 |
|       | 676.63   | 1109.94 | 3233.45 |
|       | 725.68   | 1243.14 | 3476.73 |
|       | 767.76   | 1276.70 | 3595.68 |
| T1/11 | -1288.02 | 947.99  | 1451.43 |
|       | 199.82   | 1002.85 | 1468.52 |
|       | 351.62   | 1003.25 | 1580.27 |
|       | 425.51   | 1037.71 | 1589.48 |
|       | 454.78   | 1048.79 | 1604.67 |
|       | 492.98   | 1099.34 | 1966.66 |
|       | 596.08   | 1103.39 | 3128.90 |
|       | 637.66   | 1147.53 | 3148.91 |
|       | 711.14   | 1178.16 | 3155.53 |
|       | 749.48   | 1283.22 | 3178.53 |
|       | 818.70   | 1320.79 | 3423.35 |
|       | 882.68   | 1414.86 | 3510.68 |

|       |          |         |         |
|-------|----------|---------|---------|
| T2P6  | -246.95  | 770.29  | 1372.11 |
|       | 140.69   | 783.87  | 1407.43 |
|       | 207.15   | 830.56  | 1458.78 |
|       | 225.13   | 876.73  | 1493.71 |
|       | 337.74   | 892.60  | 1533.43 |
|       | 410.37   | 960.44  | 1591.56 |
|       | 469.38   | 972.08  | 3144.81 |
|       | 513.65   | 1012.49 | 3155.69 |
|       | 543.00   | 1096.34 | 3162.03 |
|       | 619.58   | 1174.53 | 3180.96 |
|       | 640.28   | 1187.28 | 3441.00 |
|       | 734.74   | 1287.44 | 3844.11 |
| T3P4  | -1143.60 | 766.12  | 1357.66 |
|       | 176.94   | 773.98  | 1440.59 |
|       | 362.39   | 856.58  | 1496.01 |
|       | 378.98   | 878.18  | 1557.85 |
|       | 397.39   | 945.46  | 1632.98 |
|       | 441.17   | 960.84  | 1687.65 |
|       | 486.27   | 1028.11 | 3134.03 |
|       | 526.06   | 1098.75 | 3176.75 |
|       | 586.79   | 1152.80 | 3196.13 |
|       | 620.58   | 1176.38 | 3254.55 |
|       | 665.99   | 1180.08 | 3571.46 |
|       | 726.45   | 1299.58 | 3684.46 |
| T4P2  | -576.20  | 790.57  | 1402.67 |
|       | 74.20    | 850.19  | 1468.73 |
|       | 147.91   | 868.01  | 1490.55 |
|       | 177.80   | 916.29  | 1536.04 |
|       | 253.64   | 969.46  | 1660.68 |
|       | 398.56   | 998.22  | 2873.03 |
|       | 454.21   | 1048.04 | 3148.94 |
|       | 562.56   | 1090.87 | 3163.07 |
|       | 597.42   | 1164.72 | 3176.91 |
|       | 631.79   | 1190.68 | 3189.59 |
|       | 649.41   | 1282.87 | 3413.19 |
|       | 727.24   | 1322.02 | 3504.00 |
| T5P12 | -1210.75 | 776.46  | 1381.20 |
|       | 176.74   | 826.63  | 1444.50 |
|       | 316.18   | 871.66  | 1458.61 |
|       | 348.53   | 901.67  | 1563.37 |
|       | 366.36   | 931.77  | 1618.76 |
|       | 463.61   | 964.73  | 1661.64 |
|       | 504.29   | 995.68  | 2497.86 |
|       | 532.91   | 1077.97 | 3118.98 |
|       | 552.79   | 1149.36 | 3156.25 |
|       | 579.34   | 1208.14 | 3198.04 |
|       | 636.76   | 1263.55 | 3541.37 |

|       |                                                                                                                        |                                                                                                                               |                                                                                                                                  |
|-------|------------------------------------------------------------------------------------------------------------------------|-------------------------------------------------------------------------------------------------------------------------------|----------------------------------------------------------------------------------------------------------------------------------|
|       | 677.86                                                                                                                 | 1286.88                                                                                                                       | 3653.76                                                                                                                          |
| T6/5  | -997.44<br>184.82<br>341.00<br>363.13<br>426.61<br>482.53<br>538.10<br>547.21<br>612.51<br>639.92<br>761.26<br>794.84  | 916.17<br>947.95<br>958.14<br>1009.91<br>1020.00<br>1041.87<br>1080.48<br>1135.83<br>1182.05<br>1270.31<br>1300.40<br>1337.59 | 1424.55<br>1438.15<br>1546.20<br>1583.13<br>1619.07<br>1993.61<br>3102.94<br>3137.33<br>3148.15<br>3192.98<br>3552.67<br>3671.85 |
| T7P7  | -1809.41<br>231.17<br>239.73<br>342.81<br>415.46<br>463.30<br>500.57<br>610.25<br>646.67<br>689.07<br>750.38<br>808.87 | 828.36<br>859.52<br>929.62<br>942.95<br>1034.16<br>1076.25<br>1089.41<br>1119.26<br>1152.46<br>1291.66<br>1336.88<br>1345.24  | 1397.40<br>1412.51<br>1540.06<br>1581.15<br>1650.45<br>1718.87<br>2983.80<br>3116.85<br>3126.33<br>3131.91<br>3459.79<br>3573.30 |
| T7P11 | -1108.37<br>226.49<br>278.85<br>338.42<br>385.89<br>418.25<br>428.43<br>539.60<br>558.06<br>574.17<br>594.06<br>703.59 | 750.75<br>798.00<br>869.14<br>880.61<br>929.50<br>971.89<br>1080.27<br>1094.00<br>1131.01<br>1163.76<br>1277.96<br>1317.41    | 1329.06<br>1430.79<br>1436.82<br>1545.92<br>1623.06<br>1650.27<br>2331.24<br>3126.88<br>3143.06<br>3157.51<br>3544.86<br>3650.06 |
| T8P4  | -1227.13<br>167.26<br>222.78<br>349.90<br>371.27<br>422.64<br>527.66<br>532.80                                         | 790.30<br>821.00<br>841.83<br>887.42<br>952.82<br>991.60<br>1043.66<br>1071.18                                                | 1360.05<br>1455.78<br>1479.18<br>1552.64<br>1654.11<br>1692.32<br>3126.24<br>3144.31                                             |

|        |          |         |         |
|--------|----------|---------|---------|
|        | 563.06   | 1095.51 | 3166.19 |
|        | 613.86   | 1160.48 | 3172.25 |
|        | 649.43   | 1213.40 | 3561.65 |
|        | 781.81   | 1321.43 | 3655.26 |
| T9P3   | -1214.65 | 754.38  | 1365.77 |
|        | 196.42   | 806.98  | 1446.52 |
|        | 275.87   | 831.09  | 1499.58 |
|        | 318.87   | 850.82  | 1542.78 |
|        | 370.47   | 969.26  | 1637.23 |
|        | 478.51   | 989.67  | 1656.24 |
|        | 497.94   | 1047.29 | 2339.05 |
|        | 520.65   | 1087.42 | 3111.74 |
|        | 523.42   | 1118.05 | 3161.26 |
|        | 570.86   | 1193.00 | 3184.68 |
|        | 609.92   | 1268.34 | 3580.39 |
|        | 637.93   | 1300.31 | 3678.36 |
| T10P10 | -1130.58 | 766.89  | 1370.99 |
|        | 197.20   | 796.73  | 1419.68 |
|        | 341.79   | 805.43  | 1494.56 |
|        | 387.40   | 889.63  | 1562.37 |
|        | 397.10   | 932.33  | 1654.46 |
|        | 416.50   | 952.68  | 1683.04 |
|        | 452.94   | 1009.95 | 3085.67 |
|        | 489.13   | 1049.06 | 3158.25 |
|        | 536.85   | 1076.85 | 3173.76 |
|        | 584.87   | 1148.14 | 3297.10 |
|        | 662.90   | 1288.35 | 3579.95 |
|        | 755.35   | 1289.66 | 3681.93 |
| T11P5  | -131.96  | 874.95  | 1485.76 |
|        | 16.33    | 894.48  | 1509.13 |
|        | 107.88   | 930.12  | 1636.37 |
|        | 151.28   | 985.09  | 1652.53 |
|        | 394.26   | 1015.21 | 1833.47 |
|        | 422.02   | 1038.68 | 3132.68 |
|        | 432.20   | 1065.03 | 3154.60 |
|        | 491.01   | 1115.73 | 3171.00 |
|        | 540.11   | 1161.39 | 3191.08 |
|        | 635.27   | 1264.93 | 3466.07 |
|        | 647.44   | 1334.64 | 3601.54 |
|        | 746.18   | 1430.56 | 3618.20 |
| T12P2  | -273.36  | 816.92  | 1441.86 |
|        | 71.44    | 864.82  | 1511.35 |
|        | 103.27   | 891.72  | 1643.41 |
|        | 190.68   | 973.47  | 1647.79 |
|        | 364.12   | 986.93  | 1666.39 |
|        | 452.42   | 1048.33 | 3102.15 |
|        | 471.37   | 1089.02 | 3104.25 |

|        |          |         |         |
|--------|----------|---------|---------|
|        | 522.60   | 1104.02 | 3122.49 |
|        | 523.14   | 1155.47 | 3189.97 |
|        | 602.95   | 1274.42 | 3467.33 |
|        | 632.13   | 1309.32 | 3604.68 |
|        | 771.25   | 1401.35 | 3612.88 |
| T13P1  | -478.03  | 814.84  | 1387.74 |
|        | 152.22   | 864.04  | 1421.02 |
|        | 191.09   | 914.84  | 1474.33 |
|        | 330.64   | 960.89  | 1530.79 |
|        | 390.47   | 989.74  | 1539.26 |
|        | 424.27   | 1000.32 | 1617.59 |
|        | 478.15   | 1026.12 | 2482.03 |
|        | 545.23   | 1087.24 | 3160.35 |
|        | 605.94   | 1148.84 | 3175.96 |
|        | 658.84   | 1165.27 | 3187.12 |
|        | 763.93   | 1188.52 | 3194.21 |
|        | 798.94   | 1339.37 | 3433.17 |
| T13P9  | -293.64  | 739.71  | 1347.99 |
|        | 112.02   | 779.10  | 1381.13 |
|        | 178.18   | 818.21  | 1405.56 |
|        | 213.36   | 848.38  | 1513.84 |
|        | 330.34   | 897.14  | 1533.03 |
|        | 394.60   | 916.45  | 1595.02 |
|        | 447.18   | 973.61  | 3143.95 |
|        | 496.28   | 1021.82 | 3152.88 |
|        | 526.79   | 1061.40 | 3164.39 |
|        | 552.15   | 1162.52 | 3177.93 |
|        | 614.67   | 1181.19 | 3459.04 |
|        | 680.92   | 1281.10 | 3837.71 |
| T14P8  | -389.37  | 802.75  | 1371.28 |
|        | 93.50    | 854.15  | 1425.46 |
|        | 152.14   | 890.92  | 1444.85 |
|        | 174.83   | 904.91  | 1633.56 |
|        | 289.13   | 953.28  | 1635.63 |
|        | 378.33   | 978.07  | 3136.86 |
|        | 480.58   | 1006.60 | 3138.07 |
|        | 512.51   | 1052.91 | 3189.78 |
|        | 566.43   | 1144.12 | 3192.06 |
|        | 672.25   | 1178.49 | 3473.38 |
|        | 697.41   | 1257.30 | 3617.34 |
|        | 707.42   | 1291.11 | 3623.68 |
| T16P10 | -1173.28 | 771.42  | 1369.53 |
|        | 223.23   | 816.43  | 1411.71 |
|        | 251.59   | 828.62  | 1484.94 |
|        | 312.50   | 860.37  | 1594.23 |
|        | 377.78   | 961.50  | 1656.73 |
|        | 432.65   | 984.76  | 1677.74 |

|        |          |         |         |
|--------|----------|---------|---------|
|        | 502.56   | 1039.56 | 3112.49 |
|        | 504.18   | 1095.66 | 3134.73 |
|        | 589.91   | 1155.37 | 3157.92 |
|        | 662.01   | 1169.92 | 3218.20 |
|        | 667.10   | 1240.49 | 3562.27 |
|        | 747.40   | 1299.24 | 3656.65 |
| T18P2  | -1834.28 | 902.73  | 1415.98 |
|        | 173.94   | 920.79  | 1460.29 |
|        | 238.99   | 972.88  | 1495.75 |
|        | 308.83   | 985.78  | 1548.42 |
|        | 365.47   | 1010.63 | 1570.95 |
|        | 428.66   | 1066.79 | 1676.03 |
|        | 542.92   | 1090.69 | 3073.54 |
|        | 597.43   | 1120.97 | 3084.02 |
|        | 680.16   | 1177.81 | 3099.27 |
|        | 705.50   | 1238.04 | 3141.23 |
|        | 784.29   | 1293.75 | 3468.34 |
|        | 832.73   | 1330.80 | 3580.97 |
| T18P3  | -649.92  | 693.80  | 1380.09 |
|        | 109.43   | 770.83  | 1426.95 |
|        | 169.51   | 818.70  | 1483.94 |
|        | 239.18   | 845.73  | 1555.86 |
|        | 332.36   | 888.57  | 1648.76 |
|        | 354.68   | 988.68  | 1653.29 |
|        | 388.74   | 1039.90 | 1809.24 |
|        | 433.38   | 1053.50 | 3019.10 |
|        | 475.58   | 1109.19 | 3099.14 |
|        | 498.59   | 1216.85 | 3151.71 |
|        | 529.49   | 1263.48 | 3572.06 |
|        | 607.70   | 1296.11 | 3679.80 |
| T19P15 | -897.99  | 690.33  | 1335.48 |
|        | 182.54   | 763.76  | 1423.82 |
|        | 264.42   | 808.40  | 1443.08 |
|        | 313.81   | 857.70  | 1482.89 |
|        | 388.37   | 912.65  | 1606.60 |
|        | 396.42   | 1002.98 | 1633.47 |
|        | 436.65   | 1036.82 | 2162.52 |
|        | 462.35   | 1060.69 | 3136.36 |
|        | 528.88   | 1117.02 | 3176.02 |
|        | 580.98   | 1178.40 | 3214.78 |
|        | 619.79   | 1243.09 | 3579.70 |
|        | 643.43   | 1273.79 | 3697.46 |
| T20P11 | -1007.64 | 768.65  | 1368.26 |
|        | 160.31   | 815.31  | 1410.00 |
|        | 360.20   | 852.61  | 1456.98 |
|        | 379.20   | 904.60  | 1557.26 |
|        | 415.52   | 933.74  | 1618.24 |



|     |        |         |         |
|-----|--------|---------|---------|
|     | 416.99 | 943.18  | 1637.73 |
|     | 460.06 | 1007.17 | 2480.60 |
|     | 482.79 | 1062.24 | 3125.17 |
|     | 514.28 | 1148.81 | 3138.43 |
|     | 526.70 | 1202.24 | 3198.24 |
|     | 616.54 | 1293.87 | 3564.13 |
|     | 701.07 | 1310.73 | 3681.37 |
| PR1 | 156.94 | 809.53  | 1377.48 |
|     | 364.64 | 869.36  | 1407.05 |
|     | 401.05 | 914.01  | 1565.23 |
|     | 444.20 | 968.87  | 1608.72 |
|     | 510.95 | 1001.16 | 1805.11 |
|     | 581.52 | 1053.09 | 3152.44 |
|     | 613.88 | 1132.84 | 3161.39 |
|     | 745.39 | 1174.18 | 3174.60 |
|     | 766.54 | 1254.05 | 3184.07 |
|     | 794.13 | 1315.86 | 3439.36 |
| PR2 | 316.62 | 835.53  | 1385.29 |
|     | 362.72 | 909.28  | 1420.65 |
|     | 570.42 | 979.90  | 1558.64 |
|     | 585.05 | 1076.73 | 1831.15 |
|     | 617.44 | 1079.11 | 3154.93 |
|     | 776.47 | 1088.40 | 3163.97 |
|     | 821.63 | 1166.18 | 3203.80 |
|     | 822.66 | 1304.90 | 3208.16 |
| PR3 | 191.53 | 737.98  | 1375.97 |
|     | 336.55 | 761.91  | 1510.91 |
|     | 369.86 | 795.14  | 1574.55 |
|     | 409.08 | 944.42  | 1655.57 |
|     | 486.12 | 957.48  | 1830.19 |
|     | 501.21 | 1028.82 | 3187.31 |
|     | 566.79 | 1086.03 | 3189.00 |
|     | 613.82 | 1148.18 | 3191.76 |
|     | 646.52 | 1279.70 | 3604.16 |
|     | 683.95 | 1282.33 | 3712.44 |
| PR4 | 206.81 | 798.56  | 1455.46 |
|     | 336.86 | 849.76  | 1468.21 |
|     | 381.42 | 918.94  | 1525.78 |
|     | 440.18 | 937.13  | 1650.24 |
|     | 442.52 | 1003.57 | 2018.24 |
|     | 492.12 | 1075.49 | 3145.37 |
|     | 557.64 | 1158.99 | 3163.83 |
|     | 561.90 | 1186.14 | 3222.98 |
|     | 626.46 | 1292.23 | 3581.81 |
|     |        | 735.86  | 1330.06 |

|        |         |         |         |
|--------|---------|---------|---------|
| PR5    | 396.01  | 928.84  | 1424.24 |
|        | 423.83  | 969.76  | 1463.54 |
|        | 450.59  | 998.49  | 1483.01 |
|        | 595.01  | 1075.15 | 2013.39 |
|        | 627.74  | 1108.27 | 3156.98 |
|        | 753.75  | 1161.94 | 3172.77 |
|        | 844.73  | 1275.65 | 3196.82 |
|        | 873.38  | 1306.10 | 3200.28 |
| PR6    | 184.25  | 878.02  | 1402.96 |
|        | 312.62  | 891.33  | 1451.58 |
|        | 405.41  | 955.99  | 1482.66 |
|        | 468.27  | 969.42  | 1514.31 |
|        | 523.47  | 1016.34 | 1586.88 |
|        | 530.84  | 1095.37 | 3141.37 |
|        | 666.95  | 1173.70 | 3150.84 |
|        | 769.21  | 1184.53 | 3157.98 |
|        | 780.49  | 1284.86 | 3178.94 |
| 825.07 | 1371.25 | 3440.23 |         |
| PR7    | 307.34  | 788.96  | 1302.01 |
|        | 456.14  | 848.94  | 1402.03 |
|        | 475.44  | 902.44  | 1479.90 |
|        | 491.35  | 943.24  | 1703.80 |
|        | 548.10  | 1078.05 | 3197.92 |
|        | 668.49  | 1090.60 | 3201.70 |
|        | 722.18  | 1165.10 | 3219.05 |
|        | 742.01  | 1238.29 | 3219.45 |
| PR8    | 221.85  | 854.53  | 1308.35 |
|        | 260.60  | 909.35  | 1355.13 |
|        | 524.84  | 915.64  | 1582.46 |
|        | 742.15  | 942.77  | 1632.36 |
|        | 794.23  | 995.53  | 3136.75 |
|        | 810.58  | 1124.92 | 3138.41 |
|        | 821.17  | 1224.55 | 3155.22 |
|        | 832.43  | 1283.86 | 3160.40 |
| PR9    | 160.34  | 889.92  | 1392.43 |
|        | 302.29  | 920.65  | 1404.19 |
|        | 417.48  | 947.59  | 1500.76 |
|        | 430.87  | 986.61  | 1534.58 |
|        | 451.19  | 1019.47 | 1600.19 |
|        | 535.88  | 1088.68 | 3138.16 |
|        | 686.01  | 1164.03 | 3152.86 |
|        | 759.29  | 1179.25 | 3169.96 |
|        | 786.71  | 1295.03 | 3186.11 |
|        | 828.33  | 1374.12 | 3433.20 |
| PR10   | 242.55  | 821.78  | 1416.96 |
|        | 261.71  | 841.71  | 1470.33 |
|        | 384.84  | 924.38  | 1522.61 |

|      |        |         |         |
|------|--------|---------|---------|
|      | 394.65 | 937.08  | 1657.23 |
|      | 412.44 | 1068.87 | 2013.43 |
|      | 437.85 | 1088.85 | 3154.56 |
|      | 563.53 | 1142.01 | 3172.29 |
|      | 601.68 | 1251.77 | 3191.30 |
|      | 656.60 | 1289.85 | 3569.09 |
|      | 705.94 | 1325.88 | 3663.99 |
| PR11 | 138.28 | 775.53  | 1408.99 |
|      | 199.58 | 832.71  | 1441.87 |
|      | 269.96 | 859.54  | 1572.23 |
|      | 322.84 | 936.86  | 1650.23 |
|      | 374.72 | 997.70  | 1818.17 |
|      | 532.82 | 1084.83 | 3133.45 |
|      | 561.39 | 1103.97 | 3168.80 |
|      | 615.00 | 1199.34 | 3187.01 |
|      | 670.32 | 1301.47 | 3549.96 |
|      | 716.55 | 1318.77 | 3644.12 |
| PR12 | 163.75 | 793.03  | 1391.90 |
|      | 310.33 | 805.21  | 1431.64 |
|      | 382.07 | 909.82  | 1570.12 |
|      | 414.35 | 920.05  | 1622.60 |
|      | 480.51 | 947.77  | 1943.26 |
|      | 529.89 | 1075.52 | 3168.46 |
|      | 572.76 | 1080.92 | 3210.31 |
|      | 617.19 | 1217.95 | 3214.93 |
|      | 631.86 | 1268.25 | 3573.86 |
|      | 765.69 | 1307.12 | 3688.22 |
| PR15 | 188.93 | 697.07  | 1337.05 |
|      | 315.49 | 761.28  | 1453.77 |
|      | 368.61 | 804.79  | 1533.40 |
|      | 393.59 | 826.02  | 1640.08 |
|      | 441.83 | 886.20  | 1725.45 |
|      | 462.63 | 1016.58 | 3161.06 |
|      | 562.68 | 1136.00 | 3167.50 |
|      | 589.71 | 1139.05 | 3204.54 |
|      | 667.94 | 1239.98 | 3583.46 |
|      | 689.09 | 1282.26 | 3700.35 |

**Table S2.** Optimized coordinates of reactants, intermediates, transition states and products of the  $C_6H_5 + NH_2$  reaction at the B3LYP/6-311++G(3df,2p) level of theory.

|          |                                                                                                                                                                                                                                          |
|----------|------------------------------------------------------------------------------------------------------------------------------------------------------------------------------------------------------------------------------------------|
| $C_6H_5$ | C,0,-1.626850123,1.1995022696,0.0059736753<br>C,0,-0.2276986595,1.1857469769,-0.0137437076<br>C,0,0.3934452705,2.4071742905,-0.0224360666<br>C,0,-0.2263432753,3.6292891918,-0.0136412981<br>C,0,-1.6255091383,3.6170844173,0.0060749969 |
|----------|------------------------------------------------------------------------------------------------------------------------------------------------------------------------------------------------------------------------------------------|

|                 |                                                                                                                                                                                                                                                                                                                                                                                                                                                                                                                                                                                                                                                                         |
|-----------------|-------------------------------------------------------------------------------------------------------------------------------------------------------------------------------------------------------------------------------------------------------------------------------------------------------------------------------------------------------------------------------------------------------------------------------------------------------------------------------------------------------------------------------------------------------------------------------------------------------------------------------------------------------------------------|
|                 | C,0,-2.3158948367,2.4086755074,0.0157437511<br>H,0,-2.1707667147,0.2630739519,0.0135919266<br>H,0,0.3210706558,0.2532291414,-0.0215232797<br>H,0,0.3234602005,4.5611983197,-0.0213427314<br>H,0,-2.1683865598,4.5541149161,0.0137717654<br>H,0,-3.3975243807,2.409274827,0.0309859936                                                                                                                                                                                                                                                                                                                                                                                   |
| NH <sub>2</sub> | N,0,0.4997510918,1.4586319593,-0.0282739994<br>H,0,0.8677012401,0.5007321192,0.0195639089<br>H,0,0.8677182128,1.8961460369,0.8252068208                                                                                                                                                                                                                                                                                                                                                                                                                                                                                                                                 |
| IS1             | C,0,3.8777520441,0.5617233493,0.0150452085<br>C,0,3.9352371373,-0.7079713334,-0.5418555543<br>C,0,2.8371747517,-1.5601679196,-0.4875657891<br>C,0,1.6749262034,-1.1180841169,0.1358589586<br>C,0,1.6069215177,0.1497012254,0.6959040385<br>C,0,2.7096603316,1.0093831214,0.6421379012<br>H,0,4.7421276889,1.2130912148,-0.0298993125<br>H,0,4.8485849074,-1.0326324487,-1.0231828119<br>H,0,0.8092557356,-1.7655302804,0.1879502172<br>H,0,2.8859243478,-2.5482267829,-0.9228865287<br>N,0,2.6653008791,2.26254335,1.2524839688<br>H,0,3.3237774433,2.9415773374,0.9058434011<br>H,0,1.746298031,2.6553471812,1.3788872234<br>H,0,0.697302731,0.4793462025,1.1829293291 |
| IS2             | C,0,0.8425140561,0.002257148,0.1387374295<br>C,0,2.2955057345,0.309969182,-0.0238891687<br>C,0,2.6037887499,1.7726115134,-0.0201881828<br>C,0,1.665871043,2.71219312,0.1159090351<br>C,0,0.2456007079,2.3816288606,0.2740591813<br>C,0,-0.0875524588,0.9498767145,0.2741301983<br>H,0,0.5563456279,-1.0433144731,0.1438364193<br>H,0,2.8691501561,-0.1933063612,0.7662352577<br>H,0,3.6433146941,2.0569794712,-0.1347817413<br>H,0,1.912455181,3.7657244551,0.1156872666<br>H,0,-1.132872311,0.6860276405,0.3899666983<br>N,0,-0.6041548266,3.335250559,0.4001624037<br>H,0,-1.5513253167,2.968680292,0.5016367576<br>H,0,2.6669456732,-0.1463410212,-0.9515012477      |
| IS3             | C,0,1.116309884,-1.15318924,-0.4047714061<br>C,0,1.836984827,0.0711737651,0.0236798357<br>C,0,1.1242985775,1.2088272331,0.1657614317<br>C,0,-0.2949574891,1.1937674001,0.0265048245<br>C,0,-1.0097718197,0.003622586,-0.0600746655<br>C,0,-0.3545252174,-1.155349636,-0.5181741451<br>H,0,1.3381260012,-1.982087825,0.2950924824<br>H,0,2.9002371534,0.0335491663,0.2256273461<br>H,0,1.6085659698,2.1475360832,0.4031366791<br>H,0,-0.8222714392,2.1433525949,0.0148541985                                                                                                                                                                                             |

|     |                                                                                                                                                                                                                                                                                                                                                                                                                                                                                                                                                                                                                                                                                    |
|-----|------------------------------------------------------------------------------------------------------------------------------------------------------------------------------------------------------------------------------------------------------------------------------------------------------------------------------------------------------------------------------------------------------------------------------------------------------------------------------------------------------------------------------------------------------------------------------------------------------------------------------------------------------------------------------------|
|     | N,0,-2.3918081751,-0.0177900298,0.0817141121<br>H,0,1.5473867973,-1.5548030323,-1.3329109922<br>H,0,-2.8021115497,0.5831254958,0.7777039925<br>H,0,-2.7905595199,-0.9431355715,0.0340602962                                                                                                                                                                                                                                                                                                                                                                                                                                                                                        |
| IS4 | C,0,3.1564694223,-0.6461337843,0.3050469065<br>C,0,4.2253081174,-1.3740818151,-0.037679419<br>C,0,5.4934007143,-0.6176530574,-0.2462363102<br>C,0,5.2721777488,0.6049756822,-0.6928722073<br>C,0,4.1880481898,1.3549554865,-0.7061579082<br>C,0,3.1392245596,0.9125367482,0.2970424202<br>H,0,2.2478495909,-1.124718012,0.6526507899<br>H,0,4.2141920745,-2.4563364726,-0.0054957389<br>H,0,6.4124945662,-0.9733598904,0.202787307<br>H,0,3.3635265717,1.2324199802,1.3220065574<br>H,0,3.8938783194,2.0281943998,-1.5027478524<br>N,0,1.8514795673,1.510829219,-0.0556676566<br>H,0,1.1370061426,1.2618107868,0.6177084027<br>H,0,1.5380676054,1.178819489,-0.9615562711          |
| IS5 | C,0,-0.1489471843,0.0861061409,-1.774217156<br>C,0,0.3774451373,-0.6746652966,-0.6255884157<br>C,0,0.3766078763,-0.0939578171,0.5804542971<br>C,0,-0.296678681,1.2562173999,0.7875320363<br>C,0,-1.3299408002,1.4408111587,-0.2828976684<br>C,0,-1.0033012764,1.103489171,-1.5712623615<br>H,0,0.2810997472,-0.1326954937,-2.7480808572<br>H,0,0.8886133172,-1.6174917044,-0.7808768002<br>H,0,0.9054515765,-0.5218718477,1.4217244216<br>H,0,-0.748898995,1.3256512982,1.779855595<br>H,0,0.4739228803,2.0366261069,0.7525643933<br>N,0,-2.576311565,1.802996451,0.0785794914<br>H,0,-2.836682304,1.9357167388,1.0395728753<br>H,0,-3.2931511289,1.8466792242,-0.6284455811       |
| IS6 | C,0,-1.2187251131,-1.2125620718,0.231979958<br>C,0,-1.8452878296,-0.0459421609,-0.2319032674<br>C,0,-1.1618660991,1.2002756121,-0.2132510908<br>C,0,0.1412946816,1.2760862461,0.1419207787<br>C,0,0.9288165305,0.0245845235,0.4176841363<br>C,0,0.1479879475,-1.2149743949,0.2957089925<br>H,0,-1.7939367863,-2.1235052609,0.3543422437<br>H,0,-2.8540173128,-0.0899942888,-0.6257151857<br>H,0,-1.7173021195,2.1007264008,-0.4439801103<br>H,0,0.6195248808,2.2328171579,0.3179689996<br>H,0,1.1368122402,0.0623985134,1.5165528161<br>N,0,2.1764381272,-0.031821672,-0.3592795679<br>H,0,2.8694177997,0.6156704203,-0.0011162189<br>H,0,2.5557940729,-0.9706820349,-0.2975174741 |
| IS7 | C,0,1.1617222361,0.7085100908,-0.5952658503                                                                                                                                                                                                                                                                                                                                                                                                                                                                                                                                                                                                                                        |

|      |                                                                                                                                                                                                                                                                                                                                                                                                                                                                                                                                                                                                                                                                           |
|------|---------------------------------------------------------------------------------------------------------------------------------------------------------------------------------------------------------------------------------------------------------------------------------------------------------------------------------------------------------------------------------------------------------------------------------------------------------------------------------------------------------------------------------------------------------------------------------------------------------------------------------------------------------------------------|
|      | C,0,1.5761412938,0.0058743914,0.682042551<br>C,0,2.365367781,0.7259184328,1.463266768<br>C,0,2.6680377,2.0287609316,1.3687088763<br>C,0,1.6754478655,2.8343366988,0.6768931396<br>C,0,1.0204841238,2.2167033064,-0.3446621375<br>H,0,0.1994613121,0.2978532149,-0.9126571211<br>H,0,1.0356108915,-0.8779617943,0.9983737006<br>H,0,1.8336760758,0.586378416,-1.4543067014<br>H,0,3.6373548445,2.4457806756,1.6180226612<br>H,0,1.5966853395,3.9060714795,0.817325845<br>N,0,0.3146053772,2.890645777,-1.3094719856<br>H,0,-0.422250861,2.409460459,-1.7954883332<br>H,0,0.1664377802,3.8791627203,-1.1918400625                                                           |
| IS8  | C,0,0.5306647868,0.775957692,-0.2071616018<br>C,0,1.5662399763,-0.1317070754,-0.8038651391<br>C,0,2.8664032415,0.3565786842,-0.6677779197<br>C,0,3.1699166769,1.5599362647,-0.0276915004<br>C,0,2.2092563079,2.4642375758,0.4420130509<br>C,0,0.8754702762,2.1472578964,0.2887763247<br>H,0,-0.3818072425,0.7927437034,-0.812170146<br>H,0,0.2316781179,0.1979726792,0.6850091316<br>H,0,3.6990753876,-0.2252068555,-1.0520202357<br>H,0,4.2128864082,1.8361286947,0.1059384356<br>H,0,2.5109283776,3.4143342023,0.8652061612<br>N,0,-0.1206812531,3.0078220768,0.5744354073<br>H,0,-1.0821687447,2.74058109,0.4581613751<br>H,0,0.0647952833,3.9313794215,0.9280572661   |
| IS9  | C,0,1.0009322169,1.0796793567,1.2479694411<br>C,0,1.655396881,0.0306686757,0.7726803395<br>C,0,2.4713072941,-0.091171826,-0.2577757431<br>C,0,2.9512877959,1.2494333955,-0.7895115636<br>C,0,1.8620313728,2.3014372556,-0.6105765265<br>C,0,0.8398353824,2.1742034881,0.2644343515<br>H,0,3.1330391366,1.1010784078,-1.857966369<br>H,0,0.8538342187,1.3004957746,2.2994282643<br>H,0,2.5867142731,-0.9860013747,-0.8557248513<br>H,0,3.9051906039,1.6152155398,-0.3852251586<br>H,0,1.9622678349,3.2088536967,-1.1958071604<br>N,0,-0.1642286234,3.1188479701,0.4818408351<br>H,0,-1.0346786618,2.7354176597,0.8158978952<br>H,0,-0.3102819452,3.7789026702,-0.266782534 |
| IS10 | C,0,0.6929987852,0.9904231907,0.8936044355<br>C,0,1.4856775653,-0.1285113014,0.6843934467<br>C,0,2.6033070825,0.0823453443,-0.2841761541<br>C,0,2.8001965489,1.4056294412,-0.9393476184<br>C,0,1.9768033774,2.4272295731,-0.6687839441<br>C,0,0.8924244518,2.2310365669,0.2680571655                                                                                                                                                                                                                                                                                                                                                                                      |

|      |                                                                                                                                                                                                                                                                                                                                                                                                                                                                                                                                                                                                                                                                               |
|------|-------------------------------------------------------------------------------------------------------------------------------------------------------------------------------------------------------------------------------------------------------------------------------------------------------------------------------------------------------------------------------------------------------------------------------------------------------------------------------------------------------------------------------------------------------------------------------------------------------------------------------------------------------------------------------|
|      | H,0,2.5250362046,-0.693313933,-1.0615844902<br>H,0,-0.1501127715,0.9366899835,1.5845120517<br>H,0,3.5397337357,-0.212677194,0.2140335438<br>H,0,3.6183665008,1.5384933615,-1.640666686<br>H,0,2.0981338432,3.4000303622,-1.1317616902<br>N,0,0.0866798521,3.2794667405,0.5146902798<br>H,0,-0.6802523707,3.1893924637,1.1591698056<br>H,0,0.2236549747,4.1708261608,0.0707410743                                                                                                                                                                                                                                                                                              |
| IS11 | C,0,0.1042694511,1.1896018226,0.0382377191<br>C,0,0.7687287609,-0.0304767312,-0.0165894737<br>C,0,0.2557192218,-1.3010700701,-0.0507932342<br>C,0,-1.154217055,-1.302032115,-0.024033775<br>C,0,-1.9056709999,-0.1299908795,0.0305722032<br>C,0,-1.2828615416,1.1204437663,0.062025913<br>H,0,0.6113864896,2.1486035259,0.0619126719<br>H,0,2.446040566,-1.0687077124,-0.0836304559<br>H,0,-2.9888802302,-0.178913006,0.0494033386<br>H,0,-1.8704427569,2.0277972906,0.1045996009<br>N,0,2.292221006,-0.0452044836,-0.0459216757<br>H,0,2.6953031624,0.4025150766,-0.8703063448<br>H,0,2.726991828,0.3464484316,0.7908062699<br>H,0,-1.6906159122,-2.2465499158,-0.0462797473 |
| IS12 | C,0,-0.4840328763,0.9444882796,-0.3641919234<br>C,0,0.3075985914,-0.1870216267,-0.4194728673<br>C,0,0.6759400477,-0.9456611803,0.678674348<br>C,0,0.2578532266,-0.6100182077,1.9772012921<br>C,0,-0.5505519727,0.5486308191,2.0178338591<br>C,0,-0.9202024446,1.3113148877,0.9086130922<br>H,0,-0.7504391259,1.511710808,-1.248176144<br>H,0,1.3094692972,-1.8242744465,0.5032350717<br>H,0,-0.9241097781,0.8889814188,2.9818173291<br>H,0,-1.545666963,2.1915641586,1.0187294088<br>N,0,0.8108307112,-0.6329244135,-1.7771106034<br>H,0,1.398669039,0.073334101,-2.2250234129<br>H,0,1.3740413635,-1.4735006912,-1.6343082889<br>H,0,0.048572524,-0.8641573669,-2.417817251  |
| IS13 | C,0,3.0132320706,-1.5479528954,0.1908357607<br>C,0,3.6302984255,-0.9667287493,1.3733950072<br>C,0,3.1579518017,0.1686787348,1.8973168267<br>C,0,2.0066216804,0.9040460817,1.2845282193<br>C,0,1.2540394686,0.1585551997,0.1956224633<br>C,0,1.9122961474,-1.018824219,-0.3719221642<br>H,0,3.4538760549,-2.4436565317,-0.2297091817<br>H,0,4.4795735979,-1.470402794,1.8155872138<br>H,0,3.6227020692,0.6087033372,2.7710460595<br>H,0,2.3891645929,1.8338177718,0.842204689<br>H,0,1.4490794282,-1.4841317439,-1.2340749754                                                                                                                                                  |

|      |                                                                                                                                                                                                                                                                                                                                                                                                                                                                                                                                                                                                                                                                                    |
|------|------------------------------------------------------------------------------------------------------------------------------------------------------------------------------------------------------------------------------------------------------------------------------------------------------------------------------------------------------------------------------------------------------------------------------------------------------------------------------------------------------------------------------------------------------------------------------------------------------------------------------------------------------------------------------------|
|      | N,0,0.1075890348,0.599180716,-0.1592780875<br>H,0,1.2953181921,1.2324664344,2.0449433531<br>H,0,-0.2797212041,0.0409075178,-0.9208063137                                                                                                                                                                                                                                                                                                                                                                                                                                                                                                                                           |
| IS14 | C,0,1.3622956196,-0.2269123944,-0.5357204461<br>C,0,1.120717435,-1.2884588206,0.2853511727<br>C,0,-0.1512791282,-0.7732540732,0.8261288806<br>C,0,-1.4054135332,-1.0360869247,0.095432292<br>C,0,-1.309154192,0.0399775104,-0.7365646479<br>C,0,0.0432938075,0.4125627362,-0.1861447894<br>H,0,2.1441270623,0.0462025925,-1.2306837691<br>H,0,1.6182149695,-2.2440484623,0.402506357<br>H,0,-2.0929366989,-1.8732876451,0.1234955774<br>H,0,0.9203383383,1.7634194399,1.1211116277<br>N,0,0.1299695885,1.777658553,0.4749661244<br>H,0,0.2561961577,2.540819359,-0.1898677536<br>H,0,-0.734530035,1.9287482664,0.9966957708<br>H,0,-1.9102973865,0.4512579113,-1.5355023881        |
| IS16 | C,0,0.0657750725,-0.5342578378,-0.8746488163<br>C,0,1.1447440485,-0.4551313443,-0.027708123<br>C,0,1.2155806464,0.4844420343,1.0319533413<br>C,0,-0.0723137702,1.1645773697,1.3001636836<br>C,0,-1.2835939784,0.8988281778,0.4843322219<br>C,0,-1.188906284,0.117271098,-0.620003611<br>H,0,0.1339757571,-1.1332656378,-1.7805806753<br>H,0,2.0109906538,-1.0703854482,-0.2518842715<br>H,0,-0.28389153,1.006270226,2.3720437292<br>H,0,0.1480697976,2.2449539984,1.3076255852<br>H,0,-2.2328649809,1.3368910324,0.7758713529<br>N,0,-2.2226904941,-0.0758289958,-1.5418618369<br>H,0,-2.2501757719,-0.9847837279,-1.9782324275<br>H,0,-3.1364207763,0.2105802954,-1.2248610225    |
| IS18 | C,0,0.0067824973,-1.0857458524,0.2662556053<br>C,0,1.4569098604,-0.8436533529,0.0210067964<br>C,0,1.9013239502,0.3538960861,-0.392321<br>C,0,1.0520940549,1.5341246347,-0.5369264819<br>C,0,-0.3257979007,1.2833240763,-0.4544437902<br>C,0,-0.8748117998,0.0753017173,-0.0612750387<br>H,0,-0.3189830585,-1.9643545904,-0.3036327226<br>H,0,2.1262320205,-1.6778865111,0.2056188604<br>H,0,2.9650450771,0.4711645751,-0.5772869739<br>H,0,-0.1498615574,-1.3584064648,1.3187225258<br>H,0,-1.0271226972,2.1026933985,-0.6187924666<br>N,0,-2.2023123614,-0.101579903,0.1013104583<br>H,0,-2.8352389024,0.6640050359,-0.0578497008<br>H,0,-2.5867921929,-0.9480628592,0.4827629184 |
| IS19 | C,0,-0.3721855223,0.0613576757,-1.7567157593<br>C,0,0.6541272122,-0.1961191585,-0.9085181556                                                                                                                                                                                                                                                                                                                                                                                                                                                                                                                                                                                       |



|      |                                                                                                                                                                                                                                                                                                                                                                                                                                                                                                                                                                                                                                                                                |
|------|--------------------------------------------------------------------------------------------------------------------------------------------------------------------------------------------------------------------------------------------------------------------------------------------------------------------------------------------------------------------------------------------------------------------------------------------------------------------------------------------------------------------------------------------------------------------------------------------------------------------------------------------------------------------------------|
|      | C,0,0.6316507756,0.3326841233,0.4683065744<br>C,0,-0.6410460235,0.9732029556,0.8697060684<br>C,0,-1.693356759,1.0839390816,0.0028657899<br>C,0,-1.4755769083,0.8956824032,-1.4041302925<br>H,0,-0.2994991464,-0.2846201883,-2.7835122671<br>H,0,1.5416047837,-0.7276260511,-1.2345924863<br>H,0,0.896150234,-0.4733546501,1.170920629<br>H,0,-0.6826720631,1.4128633936,1.8618253746<br>H,0,1.4627287229,1.0457961691,0.5860889771<br>N,0,-2.9534317424,1.5031015695,0.3896672826<br>H,0,-3.0593497028,1.9327939893,1.2949869876<br>H,0,-3.4898758604,1.9256939171,-0.3525139927                                                                                               |
| IS20 | C,0,-0.220023231,0.4973178546,-1.7569576598<br>C,0,0.8334008883,0.1927917259,-0.7233223331<br>C,0,0.2456891094,-0.0521206443,0.634509961<br>C,0,-1.0247264331,0.2565604028,0.9276161666<br>C,0,-1.7410175698,1.0533977375,-0.0681714992<br>C,0,-1.442177953,0.9366953387,-1.4162173464<br>H,0,0.0269845895,0.2272373719,-2.7809986629<br>H,0,1.3716905418,-0.7079120796,-1.0428980415<br>H,0,0.8915238153,-0.4772637705,1.3938637235<br>H,0,-1.4435936869,0.0665819077,1.9105034941<br>H,0,1.6225624383,0.954823322,-0.6342357536<br>N,0,-2.6330692467,1.9627030142,0.3755526275<br>H,0,-2.7479643608,2.1636821009,1.3537370077<br>H,0,-3.0564272514,2.5776272582,-0.301783224 |
| T1/2 | C,0,0.6880721209,0.0961393344,-1.2874426468<br>C,0,1.6665291454,-0.1210387089,-0.3793697071<br>C,0,1.4412890571,0.3545172187,0.9817820872<br>C,0,0.8451762484,1.6691629529,1.0560951341<br>C,0,-0.1615871998,1.9141845059,0.1790688346<br>C,0,-0.4403964381,0.7076682274,-0.5829503072<br>H,0,0.6238354323,-0.376870056,-2.2558815973<br>H,0,2.5337113225,-0.7258387215,-0.6090979961<br>H,0,2.1417396723,0.0565925224,1.750139837<br>H,0,1.0441258533,2.3247739562,1.8934665902<br>H,0,-0.9128551814,2.674982808,0.3282056582<br>N,0,-1.214896414,-0.1137520407,0.1336348302<br>H,0,-1.2703331354,-1.037774653,-0.2986202055<br>H,0,-0.1259391434,-0.2616286358,0.9734212586  |
| T1/3 | C,0,-0.3327285873,-0.6878458626,-0.3262391076<br>C,0,1.1107123027,-0.8793758576,-0.2267691179<br>C,0,1.8788456083,0.2176609627,0.0031706623<br>C,0,1.2843960564,1.4901401706,0.1821253698<br>C,0,-0.0905648647,1.6617443434,0.1778390612<br>C,0,-1.0078705879,0.5678270175,-0.0123850808<br>H,0,-0.944555147,-1.5864088971,-0.280580392                                                                                                                                                                                                                                                                                                                                        |

|      |                                                                                                                                                                                                                                                                                                                                                                                                                                                                                                                                                                                                                                                                                              |
|------|----------------------------------------------------------------------------------------------------------------------------------------------------------------------------------------------------------------------------------------------------------------------------------------------------------------------------------------------------------------------------------------------------------------------------------------------------------------------------------------------------------------------------------------------------------------------------------------------------------------------------------------------------------------------------------------------|
|      | H,0,1.5436730767,-1.8617255505,-0.3597030989<br>H,0,2.9569570797,0.136279339,0.0554722871<br>H,0,1.9370613677,2.3437008963,0.3389584205<br>N,0,-0.6660918337,2.9012458318,0.3836064839<br>H,0,-0.5614296145,-0.2718595443,-1.3738600056<br>H,0,-0.1595516811,3.6004286572,0.9013960821<br>H,0,-1.6607233353,2.8728252236,0.5443607159                                                                                                                                                                                                                                                                                                                                                        |
| T1/4 | C,0,-1.0806735903,-0.8984008684,0.3856740276<br>C,0,-2.0856014215,-0.033383983,0.9988798209<br>C,0,-3.3985999497,-0.6815553263,0.7600561891<br>C,0,-3.3521528406,-0.4585637651,-0.5745416863<br>C,0,-2.574371232,-1.1517335353,-1.5060375064<br>C,0,-1.3328059693,-1.4202790258,-0.8805860004<br>H,0,-0.1138869954,-1.0155278372,0.8586040633<br>H,0,-0.5379805697,-1.9023865345,-1.4358844689<br>N,0,-1.7796913278,0.7365619827,2.1354243856<br>H,0,-0.9675564436,1.3290281702,2.0343408113<br>H,0,-2.5662057804,1.2552846607,2.4953961073<br>H,0,-2.7241268777,-1.2221231981,-2.5732655656<br>H,0,-3.8067530667,-1.5614006825,1.2490696357<br>H,0,-2.4622335754,0.5725912926,-0.2156775932 |
| T1/6 | C,0,-1.22800726,-1.2236383301,-0.1565713468<br>C,0,-1.8740472771,-0.0232710205,-0.3373773527<br>C,0,-1.1867704795,1.2205407646,-0.2823757242<br>C,0,0.1426216081,1.228621697,-0.0157998025<br>C,0,0.8183525207,-0.0360704279,0.3235780381<br>C,0,0.1680826683,-1.3448658839,0.1163233276<br>H,0,-1.8022726343,-2.1350581748,-0.2907592028<br>H,0,-2.9363506087,-0.0117089307,-0.5604972494<br>H,0,-1.7201659916,2.138634057,-0.4895482791<br>H,0,0.7249450348,2.1410644008,-0.0087871249<br>H,0,0.4708755414,-0.1986922226,1.3932965097<br>N,0,2.2783123778,0.0541032989,0.2931441802<br>H,0,2.6731916848,-0.3079716956,1.1528114392<br>H,0,2.6117428653,-0.5714672423,-0.4322350223         |
| T1P8 | C,0,0.1109222656,1.5314181938,-0.172715804<br>C,0,1.3700700748,1.0820221835,0.0202858069<br>C,0,0.9710361199,-0.3465084829,0.2101311752<br>C,0,0.7921232649,-1.2524151368,-0.9650562411<br>C,0,-0.4894474016,-0.8937305365,-1.1970513708<br>C,0,-0.4866243435,0.1462315561,-0.1022066771<br>H,0,-0.3355254447,2.5038719084,-0.3341078234<br>H,0,2.3340997141,1.5760250301,-0.0072501077<br>H,0,1.4689445892,-1.9207893147,-1.4840846283<br>H,0,-0.0645078362,-0.6033473033,1.4281978388<br>N,0,-1.1955333138,-0.2274717255,1.1987076577<br>H,0,-1.534500375,0.5548260983,1.743451469                                                                                                         |

|       |                                                                                                                                                                                                                                                                                                                                                                                                                                                                                                                                                                                                                                                                                          |
|-------|------------------------------------------------------------------------------------------------------------------------------------------------------------------------------------------------------------------------------------------------------------------------------------------------------------------------------------------------------------------------------------------------------------------------------------------------------------------------------------------------------------------------------------------------------------------------------------------------------------------------------------------------------------------------------------------|
|       | H,0,-1.9024638175,-0.9459597133,1.1110304611<br>H,0,-1.2538735062,-1.2040377571,-1.8973247763                                                                                                                                                                                                                                                                                                                                                                                                                                                                                                                                                                                            |
| T1/7  | C,0,-1.7399127423,-0.3515954505,-1.2405465498<br>C,0,-1.1774952472,0.4001355865,-0.1342166367<br>C,0,-2.0653083217,0.9364239973,0.8246364988<br>C,0,-3.4488012366,0.7599871946,0.6417845552<br>C,0,-3.6513710403,-0.1273845921,-0.4241727765<br>C,0,-2.8277326325,-1.1789260148,-0.6632239387<br>H,0,-1.0893514948,-0.6323970963,-2.0713383366<br>H,0,-2.9151636243,0.4791180257,-1.4246639286<br>H,0,-2.7230567933,-2.065033885,-0.0441329052<br>N,0,0.1822095409,0.6612022426,-0.0882219759<br>H,0,0.7034966343,0.4602259581,-0.9265548629<br>H,0,0.4749412773,1.5077547882,0.3728356833<br>H,0,-4.1688427924,1.4514603571,1.0604737863<br>H,0,-1.6963839672,1.6631833686,1.5391419774 |
| T1/8  | C,0,-0.9591609798,0.0424596701,0.0988524975<br>C,0,-0.0947341698,1.2025596889,-0.0314649882<br>C,0,1.3473425657,1.1495127511,-0.1149000965<br>C,0,1.8447685743,-0.1825110059,-0.2072698517<br>C,0,1.0385123373,-1.2918334323,-0.0701941382<br>C,0,-0.3579482081,-1.1965087567,0.0721878031<br>H,0,0.4208340195,1.410420814,-1.1233471244<br>H,0,2.9111623957,-0.3297703537,-0.3356449074<br>H,0,-0.5581216966,2.1727895954,0.1452736536<br>H,0,1.4783321369,-2.2839436927,-0.0783508642<br>H,0,-0.9550897119,-2.0955673103,0.1665029384<br>N,0,-2.3146409635,0.2208003574,0.2016402382<br>H,0,-2.6583189549,1.123048885,0.483769918<br>H,0,-2.8872323248,-0.5583322203,0.4803199318      |
| T1/9  | C,0,-1.4482853286,1.0755243549,-0.2618518435<br>C,0,-1.78931892,-0.0603840858,0.6371341889<br>C,0,-1.2035326651,-0.9702767844,-0.1720927605<br>C,0,0.1905931673,-1.1411744192,-0.160968097<br>C,0,0.7922594031,0.1296156746,0.0386529807<br>C,0,-0.0496510895,1.2706307408,-0.0350264273<br>H,0,-1.7855883792,-0.0677162212,1.7227742828<br>H,0,-2.1059573661,1.8924763705,-0.5457042325<br>H,0,-1.4262030706,-0.072490139,-1.1889174234<br>H,0,0.7433508264,-1.9329790782,-0.649906309<br>H,0,0.3957630879,2.255171528,-0.1168497562<br>N,0,2.1748524051,0.2668464515,-0.0055966439<br>H,0,2.7048820654,-0.4633733281,0.4400176146<br>H,0,2.5427208738,1.1845279358,0.1817164363        |
| T1/10 | C,0,-0.0716809654,-0.3228694544,-0.575848891<br>C,0,1.0167771196,-1.2655357302,-0.7023006688<br>C,0,1.9884350213,-1.4827066552,0.3417548874                                                                                                                                                                                                                                                                                                                                                                                                                                                                                                                                              |

|       |                                                                                                                                                                                                                                                                                                                                                                                                                                                                                                                                                                                                                                                                                     |
|-------|-------------------------------------------------------------------------------------------------------------------------------------------------------------------------------------------------------------------------------------------------------------------------------------------------------------------------------------------------------------------------------------------------------------------------------------------------------------------------------------------------------------------------------------------------------------------------------------------------------------------------------------------------------------------------------------|
|       | C,0,1.8542830436,-0.5984927729,1.4391748322<br>C,0,0.7796321015,0.2636735095,1.6105955672<br>C,0,-0.18078436,0.4098552874,0.5577675262<br>H,0,-0.791837783,-0.2050480221,-1.3768962238<br>H,0,0.963410476,-1.9852178071,-1.51477323<br>H,0,2.1498685634,-0.8355489858,-0.8975089481<br>H,0,2.5959069272,-0.6379347327,2.2341782323<br>H,0,-0.9883567987,1.1226159032,0.6808728058<br>N,0,0.6333166233,1.0354564581,2.7335530826<br>H,0,-0.2590628531,1.4536137718,2.9326697342<br>H,0,1.1997441244,0.8217048704,3.5365778538                                                                                                                                                        |
| T1/11 | C,0,-1.3396812402,-0.3097278859,-1.6108660394<br>C,0,-1.2912940138,0.8089866607,-0.797375687<br>C,0,-2.257789055,1.2611571976,0.088221159<br>C,0,-3.411082525,0.468147382,0.1434335374<br>C,0,-3.52830013,-0.6751922495,-0.6496970563<br>C,0,-2.5073309216,-1.0646859995,-1.5189462378<br>H,0,-0.5390909948,-0.5990461507,-2.2803840208<br>H,0,-0.9608878027,2.2769856601,0.119386234<br>H,0,-4.4271337023,-1.2786774548,-0.5957243581<br>H,0,-2.6209393714,-1.9546683065,-2.1236949278<br>N,0,-0.1937002919,1.8027631833,-0.6702432041<br>H,0,0.6808776471,1.447863732,-0.2872806193<br>H,0,-0.0047126912,2.3603941884,-1.5014061744<br>H,0,-4.2315203372,0.729688753,0.8032809248 |
| T1/13 | C,0,0.2741573302,1.8378119745,0.8436606571<br>C,0,1.6605624852,2.1689008562,0.9738603765<br>C,0,2.1843047521,3.1658434489,0.1965921917<br>C,0,1.3409889782,3.9335311744,-0.662033145<br>C,0,0.0158051297,3.6436794366,-0.8666654388<br>C,0,-0.4463432638,2.4381807261,-0.2758059947<br>H,0,-0.2920183876,1.8043987519,1.7755829204<br>H,0,2.2672440646,1.6890298034,1.732028438<br>H,0,3.2270216436,3.438992148,0.2816311576<br>H,0,1.7795841501,4.7696533332,-1.1935327958<br>H,0,-0.5894813067,4.2102582512,-1.5618763724<br>N,0,-1.3337580782,1.5346461255,-0.650366358<br>H,0,-0.6151680869,0.8337612299,0.3381878643<br>H,0,-2.1657847305,1.8097096202,-1.173124041            |
| T1/16 | C,0,-0.2177784623,0.9202430459,0.3114068838<br>C,0,1.1262096588,1.4893692648,0.3631458001<br>C,0,1.4833827979,2.8102109107,-0.1542994693<br>C,0,0.305897433,3.5563347399,-0.509538216<br>C,0,-0.966468311,3.0570487016,-0.4674880648<br>C,0,-1.2604125197,1.7127002225,-0.0701713313<br>H,0,-0.3795209052,-0.1129733387,0.5977095058<br>H,0,1.9350860736,0.7678964689,0.4586704178                                                                                                                                                                                                                                                                                                  |

|       |                                                                                                                                                                                                                                                                                                                                                                                                                                                                                                                                                                                                                                                                                     |
|-------|-------------------------------------------------------------------------------------------------------------------------------------------------------------------------------------------------------------------------------------------------------------------------------------------------------------------------------------------------------------------------------------------------------------------------------------------------------------------------------------------------------------------------------------------------------------------------------------------------------------------------------------------------------------------------------------|
|       | H,0,1.2424243338,2.1244842957,1.3182927458<br>H,0,0.4362444774,4.5689705094,-0.878238113<br>H,0,-1.8041558759,3.6870480161,-0.7569186993<br>N,0,-2.5896102,1.3006513221,-0.0530083492<br>H,0,-2.7420961484,0.3048625284,-0.0219548201<br>H,0,-3.2038240119,1.7628562627,-0.7047600002                                                                                                                                                                                                                                                                                                                                                                                               |
| T1/18 | C,0,-0.7781343172,1.7634762178,0.7975879454<br>C,0,-0.0127279126,0.4950769347,0.5294309463<br>C,0,1.1729040188,0.9139409188,0.0683092391<br>C,0,1.1223739951,2.3798533962,0.1842640812<br>C,0,0.2423326969,2.9908521517,-0.8501965655<br>C,0,-0.9821189349,2.636782611,-0.4327335324<br>H,0,-1.5814325655,1.7643285447,1.5331857933<br>H,0,-0.3744455844,-0.5065878881,0.7008969325<br>H,0,1.9980020006,0.3696431996,-0.3658884752<br>H,0,0.1355035715,2.4121045614,1.3149351548<br>H,0,0.5676644365,3.6248880303,-1.6586808695<br>N,0,-2.2539691851,3.0881503153,-0.7785312177<br>H,0,-2.3113895102,3.5381754709,-1.6804784806<br>H,0,-2.9815073096,2.3951558657,-0.6724535817     |
| T1/19 | C,0,0.2211445269,0.3356598101,0.1752488051<br>C,0,0.5504523989,-0.885262294,-0.2643216575<br>C,0,-0.2900078831,-1.1072507661,-1.5154699907<br>C,0,-1.7829749456,-1.0746380533,-1.2695568446<br>C,0,-2.0101516103,0.1596532901,-0.7943113144<br>C,0,-0.6967817444,0.8574698878,-0.848998512<br>H,0,0.5539661473,0.8854457985,1.0419050639<br>H,0,1.2989874608,-1.5639346797,0.1159962582<br>H,0,0.082230855,-1.8074597083,-2.2612889356<br>H,0,-2.4549679861,-1.9112660988,-1.37647217<br>H,0,-0.1540598832,-0.0260799162,-2.0217286221<br>N,0,-3.0696531554,0.7765659165,-0.1588839158<br>H,0,-3.930104137,0.2515494524,-0.1351904575<br>H,0,-3.2160219839,1.744268751,-0.402972387 |
| T1/20 | C,0,-1.0213917038,-0.7194583002,-1.0882632053<br>C,0,0.1889300397,-0.5748409741,-0.2561462403<br>C,0,0.5400631569,0.8335006695,-0.3425584287<br>C,0,-0.4523232507,1.8032239144,-0.3670362431<br>C,0,-1.8126746364,1.3950121268,-0.2168307237<br>C,0,-1.863240974,-0.0066206393,-0.2950161731<br>H,0,-1.0720916654,-0.8122252656,-2.1706370311<br>H,0,0.9768689726,-1.3167412356,-0.1452650373<br>H,0,1.5808043424,1.1275166388,-0.2807082967<br>H,0,-0.1923737034,2.8528132608,-0.2966262058<br>H,0,-0.886556887,-0.3539447265,0.673011932<br>N,0,-2.8085265404,2.2549875719,0.198426967<br>H,0,-3.7036879498,1.8357382958,0.3848605183                                             |

|      |                                                                                                                                                                                                                                                                                                                                                                                                                                                                                                                                                                                                                                                                                     |
|------|-------------------------------------------------------------------------------------------------------------------------------------------------------------------------------------------------------------------------------------------------------------------------------------------------------------------------------------------------------------------------------------------------------------------------------------------------------------------------------------------------------------------------------------------------------------------------------------------------------------------------------------------------------------------------------------|
|      | H,0,-2.5602928106,2.9855637034,0.8471700877                                                                                                                                                                                                                                                                                                                                                                                                                                                                                                                                                                                                                                         |
| T1P1 | C,0,0.9979141711,-0.8422433327,-0.6633968654<br>C,0,2.1813390698,-0.440650032,-0.1650815136<br>C,0,2.0033830534,0.6477416302,0.8130074956<br>C,0,0.9754713377,1.4681597819,0.5335354459<br>C,0,-0.0014562279,1.401371435,-0.4374192304<br>C,0,-0.2225270009,0.0023177982,-0.3540042173<br>H,0,0.8875509214,-1.7240369704,-1.28396365<br>H,0,3.1119916304,-0.9672449387,-0.3315544808<br>H,0,2.3844012686,0.5286000437,1.8182730401<br>H,0,0.0316282416,1.0230836857,1.7940432753<br>H,0,-0.7571834873,2.1515650201,-0.6111370715<br>N,0,-1.1763110315,-0.3576848916,0.5008637898<br>H,0,-1.1679132898,-1.3538285176,0.7249872768<br>H,0,-0.6904048666,0.3083098482,1.5647169554     |
| T1P2 | C,0,0.1863784489,1.3058537298,-0.2390840624<br>C,0,0.6322493903,-0.0280092871,-0.4747834779<br>C,0,1.3735794293,-0.8948879896,0.4975477587<br>C,0,0.0290670558,-0.811525404,0.7543545377<br>C,0,-0.8186075792,0.0925837819,1.4961878406<br>C,0,-0.6702017208,1.329095841,0.8968338578<br>H,0,0.2654541066,2.113775339,-0.9536381222<br>H,0,2.2134838072,-0.665871516,1.1393569252<br>H,0,-1.3596840984,-0.1269305551,2.4011802072<br>H,0,-1.1323996038,2.2345462173,1.268445999<br>N,0,0.171346606,-0.800795746,-1.7045182182<br>H,0,-0.4105572988,-0.2629804736,-2.33692398<br>H,0,0.9132511972,-1.3003781879,-2.1803032744<br>H,0,-0.3853877903,-1.2520103996,-0.5646530111       |
| T1P5 | C,0,-1.3396812402,-0.3097278859,-1.6108660394<br>C,0,-1.2912940138,0.8089866607,-0.797375687<br>C,0,-2.257789055,1.2611571976,0.088221159<br>C,0,-3.411082525,0.468147382,0.1434335374<br>C,0,-3.52830013,-0.6751922495,-0.6496970563<br>C,0,-2.5073309216,-1.0646859995,-1.5189462378<br>H,0,-0.5390909948,-0.5990461507,-2.2803840208<br>H,0,-0.9608878027,2.2769856601,0.119386234<br>H,0,-4.4271337023,-1.2786774548,-0.5957243581<br>H,0,-2.6209393714,-1.9546683065,-2.1236949278<br>N,0,-0.1937002919,1.8027631833,-0.6702432041<br>H,0,0.6808776471,1.447863732,-0.2872806193<br>H,0,-0.0047126912,2.3603941884,-1.5014061744<br>H,0,-4.2315203372,0.729688753,0.8032809248 |
| T2P6 | C,0,4.032856554,-0.4363991998,0.5654775317<br>C,0,4.3703871022,0.6291228435,-0.3692174237<br>C,0,3.3995924664,1.2859049598,-1.0638208063<br>C,0,2.1082923409,0.7209281346,-1.04088675                                                                                                                                                                                                                                                                                                                                                                                                                                                                                               |

|       |                                                                                                                                                                                                                                                                                                                                                                                                                                                                                                                                                                                                                                                                                          |
|-------|------------------------------------------------------------------------------------------------------------------------------------------------------------------------------------------------------------------------------------------------------------------------------------------------------------------------------------------------------------------------------------------------------------------------------------------------------------------------------------------------------------------------------------------------------------------------------------------------------------------------------------------------------------------------------------------|
|       | C,0,1.6702032995,0.0203345639,0.1032008886<br>C,0,2.6132854349,-0.6595275469,0.8124805226<br>H,0,2.334439129,-1.4223466448,1.5308884027<br>H,0,5.4231861325,0.8134582776,-0.5402294695<br>H,0,3.6493630156,2.0726533596,-1.765049115<br>H,0,0.6334980954,2.6452343724,-1.0751869808<br>H,0,0.613189647,-0.1239174384,0.2915498057<br>N,0,4.9969239368,-1.0886646302,1.1311419476<br>H,0,0.8869656768,2.0058600441,-1.4238650726<br>H,0,4.6307978891,-1.7942832855,1.771808259                                                                                                                                                                                                            |
| T3P4  | C,0,-1.0299360634,-0.9809838706,-0.1849177031<br>C,0,-1.8189429321,0.1385262406,0.0700764419<br>C,0,-1.0346146365,1.265323659,0.2638830172<br>C,0,0.3610882542,1.1812525588,0.1934766796<br>C,0,1.0135900806,-0.0325776495,-0.0760323854<br>C,0,0.2605582347,-1.2160603767,-0.2862574797<br>H,0,-1.8691430923,-1.9751007074,-0.7772634527<br>H,0,-2.8982773354,0.139875937,0.113549649<br>H,0,-1.503695171,2.2175047533,0.4730162862<br>H,0,0.9436428984,2.0819270204,0.3569666737<br>N,0,2.3981841924,-0.0993828952,-0.0966356437<br>H,0,-1.8342227398,-2.1396382802,0.0350555712<br>H,0,2.9135067866,0.74467902,-0.2855948395<br>H,0,2.7734975234,-0.9294363993,-0.5249868146          |
| T4P2  | C,0,-1.2894128315,-0.4388292883,-1.0142328646<br>C,0,-1.2900845744,0.6853439875,-0.1684776412<br>C,0,-2.478825092,1.1463491385,0.4670611141<br>C,0,-3.5554028301,0.4566238815,0.0412585194<br>C,0,-3.6718898618,-0.5337028135,-0.8709692716<br>C,0,-2.4537732724,-1.1210761685,-1.2989210229<br>H,0,-0.348393257,-0.7689058743,-1.4321609758<br>H,0,-0.3260549463,1.0942820548,0.1897468312<br>H,0,-2.4364788771,1.7968525816,1.3291839997<br>H,0,-4.6078062659,-0.7872991027,-1.3542725911<br>H,0,-2.451169285,-1.9957997148,-1.9378884024<br>N,0,0.3425158711,2.0875285378,-1.0740649132<br>H,0,0.1396910684,1.703928462,-1.9992130135<br>H,0,-0.2815158961,2.8959725885,-1.0115656082 |
| T5P12 | C,0,-0.8391711239,-0.7081590679,-1.40209471<br>C,0,0.4977373103,-0.6505576262,-0.9554135716<br>C,0,0.7608562224,0.2426783702,0.0630383598<br>C,0,-0.2602920676,1.1132129254,0.4441327805<br>C,0,-1.553020451,1.2062206351,-0.0564023047<br>C,0,-1.7615819117,0.2211106362,-0.9981327272<br>H,0,-1.146910836,-1.5403716868,-2.0281272969<br>H,0,1.2635907543,-1.3253028567,-1.3189355446<br>H,0,1.7251978807,0.2954891024,0.5472838112                                                                                                                                                                                                                                                    |

|       |                                                                                                                                                                                                                                                                                                                                                                                                                                                                                                                                                                                                                                                                                                                  |
|-------|------------------------------------------------------------------------------------------------------------------------------------------------------------------------------------------------------------------------------------------------------------------------------------------------------------------------------------------------------------------------------------------------------------------------------------------------------------------------------------------------------------------------------------------------------------------------------------------------------------------------------------------------------------------------------------------------------------------|
|       | <p>H,0,0.0824098798,1.4322534841,2.0214724608<br/> H,0,0.1074069874,1.976406272,1.3001403729<br/> N,0,-2.463903797,2.1955598014,0.2656753143<br/> H,0,-2.0957730064,3.0999898458,0.5164259693<br/> H,0,-3.2473172712,2.2350816549,-0.3701486338</p>                                                                                                                                                                                                                                                                                                                                                                                                                                                              |
| T6/5  | <p>C,0,-1.1364649924,-1.2371816387,0.016479369<br/> C,0,-1.8455958766,-0.0326028119,-0.1062022003<br/> C,0,-1.1891594424,1.18412659,-0.0399842962<br/> C,0,0.2023312532,1.191925157,0.0732434642<br/> C,0,0.9299624803,-0.0715230553,0.032294639<br/> C,0,0.2581822587,-1.3490587418,0.060336625<br/> H,0,-1.7256499661,-2.1501427644,0.0438817428<br/> H,0,-2.9259035007,-0.0453929469,-0.1984402631<br/> H,0,-1.7297666202,2.1196681362,-0.0274291655<br/> H,0,0.7518779052,2.1206915301,0.1835629442<br/> H,0,0.517475567,0.2936582777,1.1723130496<br/> N,0,2.2992820108,-0.0600674057,-0.1779031051<br/> H,0,2.8246500497,0.7821762627,-0.0078935746<br/> H,0,2.7537298733,-0.923199589,0.079135771</p>     |
| T7P7  | <p>C,0,0.2580667481,1.1469043004,0.255805304<br/> C,0,-1.1065070229,1.2967210297,-0.1931412287<br/> C,0,-1.8594632781,0.1670952417,-0.090795728<br/> C,0,-1.4062158148,-1.0951941624,0.1197105691<br/> C,0,0.0088825644,-1.3161939248,-0.0918485249<br/> C,0,0.7537661085,-0.2126775952,0.1538977944<br/> H,0,0.7373826702,1.7849517332,1.0094660368<br/> H,0,-1.4551269224,2.2071063366,-0.667852681<br/> H,0,1.623922616,1.131832783,-0.3741378843<br/> H,0,-2.0245395132,-1.8784271473,0.5459909361<br/> H,0,0.4517190628,-2.2622540304,-0.3858626219<br/> N,0,2.206902797,-0.0243772567,-0.1080972666<br/> H,0,2.8352496045,-0.2452449489,0.6601574867<br/> H,0,2.5228313797,-0.4773123586,-0.9575371917</p> |
| T7P11 | <p>C,0,-0.1651620423,0.1850101183,-1.598210973<br/> C,0,1.0059301464,0.8712994826,-1.5864446794<br/> C,0,1.4407080928,1.7651919283,-0.644307259<br/> C,0,0.5342989309,2.2562489719,0.3011028068<br/> C,0,-0.6880158863,1.5908882618,0.421109655<br/> C,0,-0.9902161274,0.6122653792,-0.54619548<br/> H,0,-0.5394035186,-0.4327861188,-2.4039803425<br/> H,0,-2.1281935277,-0.4969907338,0.3329797666<br/> H,0,2.4849671015,2.0513178086,-0.5816009494<br/> H,0,0.8001457536,3.0442322855,0.9990495305<br/> H,0,-2.0745431038,0.1613376292,-0.5007826956<br/> N,0,-1.6061420971,1.9385589828,1.4008674955<br/> H,0,-1.2273080856,2.4384512538,2.1894619478<br/> H,0,-2.2415626464,1.2043399907,1.6778086867</p>   |



|        |                                                                                                                                                                                                                                                                                                                                                                                                                                                                                                                                                                                                                                                                                    |
|--------|------------------------------------------------------------------------------------------------------------------------------------------------------------------------------------------------------------------------------------------------------------------------------------------------------------------------------------------------------------------------------------------------------------------------------------------------------------------------------------------------------------------------------------------------------------------------------------------------------------------------------------------------------------------------------------|
| T8P4   | C,0,-1.2415249012,-0.4811139912,-0.8299620962<br>C,0,-0.0605405771,-1.2229585175,-0.6259615193<br>C,0,0.9986957131,-0.6526555106,0.0756545743<br>C,0,0.9375605644,0.6448176736,0.6029586327<br>C,0,-0.2087527728,1.4208555943,0.4302046364<br>C,0,-1.1778298214,0.7234040747,-0.3019409216<br>H,0,-2.4422058442,1.4023701628,-0.1211137342<br>H,0,0.0419978643,-2.23306782,-1.0068803509<br>H,0,1.9084973216,-1.2221501494,0.2341313744<br>H,0,1.7783015818,1.0539160349,1.1493073233<br>H,0,-2.0885456616,1.6809424749,-0.8256512851<br>N,0,-0.325277651,2.7331265196,0.8661898161<br>H,0,-1.2508859165,3.0435306393,1.1194487851<br>H,0,0.3620403705,3.0206659346,1.5447724349   |
| T9P3   | C,0,0.8847823624,-1.8761112043,-0.2688440153<br>C,0,2.1076498026,-2.4415326143,0.1028783102<br>C,0,2.9572564129,-1.4452477038,0.4962603337<br>C,0,2.7250867195,-0.0998055096,0.5142810877<br>C,0,1.4045486503,0.3832016316,0.3371907106<br>C,0,0.5041118258,-0.5368800818,-0.1936185562<br>H,0,2.2573284814,-3.5047067672,0.2332676774<br>H,0,0.0242558722,-2.6403202725,-0.6210946316<br>H,0,0.0377281014,-2.4620551972,-1.5855732435<br>H,0,3.5434064999,0.6124230637,0.5729949066<br>H,0,-0.483204299,-0.2383589932,-0.5177644409<br>N,0,1.0785048304,1.7190839125,0.5284353955<br>H,0,1.6534282066,2.2228579932,1.1832416637<br>H,0,0.1004810636,1.9399672529,0.6210412321     |
| T10P10 | C,0,-1.0360363434,-0.3673891975,0.5337271747<br>C,0,-0.0257365313,-0.7979904144,-0.3098148122<br>C,0,0.9220004469,-0.1811628685,-0.9757230152<br>C,0,0.9005055556,1.2025052406,-0.7774734971<br>C,0,-0.0629669326,1.8021519595,0.0568645333<br>C,0,-1.0325875929,1.0032278234,0.711813751<br>H,0,-0.3736922467,-2.1639910425,-0.7484860862<br>H,0,0.1339033409,-2.2442311422,-0.1053821697<br>H,0,-1.7669376661,1.4667854756,1.358054616<br>H,0,1.6246761311,1.8550141816,-1.2612439052<br>H,0,-1.7577388065,-1.0166317965,1.0132951832<br>N,0,-0.0449891401,3.1671041547,0.2850753253<br>H,0,0.476834185,3.726311354,-0.3695315379<br>H,0,-0.8980979402,3.6007140721,0.5959191001 |
| T11P5  | C,0,-0.1217083542,1.2125123522,-0.148668197<br>C,0,-0.6056612398,-0.0545450782,0.0193942189<br>C,0,-0.0829767782,-1.1999610369,0.1840073226<br>C,0,1.320679251,-1.2257265765,0.2054963413<br>C,0,1.9843790929,-0.0042636421,0.0462216577                                                                                                                                                                                                                                                                                                                                                                                                                                           |

|       |                                                                                                                                                                                                                                                                                                                                                                                                                                                                                                                                                                                                                                                                             |
|-------|-----------------------------------------------------------------------------------------------------------------------------------------------------------------------------------------------------------------------------------------------------------------------------------------------------------------------------------------------------------------------------------------------------------------------------------------------------------------------------------------------------------------------------------------------------------------------------------------------------------------------------------------------------------------------------|
|       | C,0,1.2813809869,1.1945782963,-0.1278382625<br>H,0,-0.695406984,2.118205956,-0.2810954476<br>H,0,-2.9614481386,-0.6834026296,-0.8153743095<br>H,0,3.0677740768,0.0212286087,0.0569351037<br>H,0,1.8214696902,2.1251101741,-0.2489619233<br>N,0,-2.8080852757,-0.0841462939,-0.013872507<br>H,0,-2.9464208485,-0.6326358285,0.8256753268<br>H,0,-3.4691640659,0.6855449541,-0.0326754066<br>H,0,1.8911755875,-2.1382032558,0.3383950825                                                                                                                                                                                                                                      |
| T12P2 | C,0,-0.4456515182,0.8873538536,-0.356584389<br>C,0,0.3274644552,-0.2388048654,-0.306771891<br>C,0,0.7426404384,-1.0451057552,0.6962222189<br>C,0,0.2298283018,-0.5541163145,1.9033342481<br>C,0,-0.5700025365,0.5815326799,1.9944136505<br>C,0,-0.9300340449,1.331580607,0.8782616161<br>H,0,-0.668965705,1.4004252767,-1.2806324751<br>H,0,1.3674015891,-1.9270348063,0.6000645356<br>H,0,-0.927924402,0.8967122841,2.9702640554<br>H,0,-1.5542197262,2.2196445842,0.9404997994<br>N,0,0.9229628698,-0.712709078,-2.1744061041<br>H,0,1.4808291712,0.0325133565,-2.5756431214<br>H,0,1.4890896168,-1.5479071027,-2.0869471144<br>H,0,0.1255633304,-0.90643838,-2.769541329 |
| T13P1 | C,0,0.9780904584,1.3762723,-0.1875515975<br>C,0,1.6858144785,0.1512884103,-0.0850673796<br>C,0,0.9835228718,-1.0370595626,0.0455575873<br>C,0,-0.3711576964,-1.0509156321,0.224255049<br>C,0,-1.1121810938,0.1982528678,0.2957838101<br>C,0,-0.3675237268,1.4152999124,0.0273329802<br>H,0,1.5282729267,2.294206097,-0.3501370804<br>H,0,2.7671249563,0.1588435358,-0.0630617441<br>H,0,1.4537438675,-2.0539289884,-0.1007156144<br>H,0,-0.9277242905,-1.977954906,0.2491725198<br>H,0,-0.907617393,2.3536583256,0.0215956773<br>N,0,-2.3972849107,0.1313044347,0.4924931032<br>H,0,1.1720214677,-3.2994852173,-0.7238511146<br>H,0,-2.8267229157,1.0537434428,0.3968868038 |
| T13P9 | C,0,2.2269763127,2.2434755902,0.7777610764<br>C,0,2.9261538435,2.6800860892,-0.3072628149<br>C,0,2.1296051748,3.189960434,-1.3352617742<br>C,0,0.7465344766,2.8856535124,-1.3870151201<br>C,0,0.1397128658,2.1658551438,-0.4068582155<br>C,0,0.8974179564,1.7008051936,0.7642532112<br>H,0,3.2682060824,1.3549823575,1.9410584968<br>H,0,3.9890064552,2.8853408444,-0.2697597757<br>H,0,2.5531061848,3.9051013883,-2.0295564563<br>H,0,3.694493529,0.7184752595,2.0260184048                                                                                                                                                                                                |

|        |                                                                                                                                                                                                                                                                                                                                                                                                                                                                                                                                                                                                                                                                                       |
|--------|---------------------------------------------------------------------------------------------------------------------------------------------------------------------------------------------------------------------------------------------------------------------------------------------------------------------------------------------------------------------------------------------------------------------------------------------------------------------------------------------------------------------------------------------------------------------------------------------------------------------------------------------------------------------------------------|
|        | H,0,-0.8474947079,1.7412591158,-0.552429094<br>N,0,0.4703691497,0.8359271852,1.6295878544<br>H,0,0.1827380931,3.1865958599,-2.2609724653<br>H,0,-0.5008953661,0.5940737062,1.4360628123                                                                                                                                                                                                                                                                                                                                                                                                                                                                                               |
| T14P8  | C,0,1.3817403013,-0.1774602146,-0.6042793331<br>C,0,1.1666734638,-1.1891553843,0.3540906091<br>C,0,-0.1394186527,-0.7427585247,0.7088951409<br>C,0,-1.4405952999,-0.928677446,0.1580716517<br>C,0,-1.3081212963,0.0912691213,-0.806507762<br>C,0,0.051745911,0.3308922778,-0.407094104<br>H,0,2.1571970437,0.0056062754,-1.333664458<br>H,0,1.7241500486,-2.0932310489,0.5765953237<br>H,0,-2.1917134245,-1.7020185823,0.2821939616<br>H,0,0.9212671013,1.9472917023,1.3283187595<br>N,0,0.1401260049,2.0415313218,0.6905194956<br>H,0,0.2656340499,2.8516938236,0.0977005722<br>H,0,-0.7299331626,2.1122540746,1.204178679<br>H,0,-1.915705476,0.4125076528,-1.6398722862            |
| T16P10 | C,0,1.2244584804,-2.1484322219,-0.0945667527<br>C,0,2.1185182643,-2.0210515886,0.8640603074<br>C,0,2.5638352199,-0.6750599667,0.9186296566<br>C,0,2.0831549904,0.2962214439,0.0524338835<br>C,0,1.1125261619,0.0113005311,-0.9364597715<br>C,0,0.6412609086,-1.2940679874,-1.0281102277<br>H,0,0.3969572349,-3.3029825403,-0.0053935662<br>H,0,1.0027420105,-3.4803398067,-0.5486173446<br>H,0,3.3051689912,-0.3746337665,1.6529958771<br>H,0,2.4578058949,1.3129661371,0.1225094046<br>H,0,-0.0977770828,-1.6022265316,-1.7573701274<br>N,0,0.6963561497,1.0049129148,-1.8279795103<br>H,0,-0.2000661044,0.8499853222,-2.2622347345<br>H,0,0.7821792305,1.9484477306,-1.4838928543   |
| T18P2  | C,0,0.1339058933,-1.1705077357,0.02105626<br>C,0,1.454802925,-0.8075607371,-0.3469932216<br>C,0,1.8008699956,0.5266635553,-0.3711052683<br>C,0,0.9301947317,1.6156783044,-0.0559592361<br>C,0,-0.3915416808,1.2152007002,0.3074265008<br>C,0,-0.7457048284,-0.1005499692,0.3566057123<br>H,0,-1.1871847529,-1.3861707711,-0.5234145318<br>H,0,2.1798119392,-1.5857732377,-0.5611410381<br>H,0,2.8214004415,0.7627408268,-0.6621177958<br>H,0,-0.0334566634,-2.1565768421,0.4566332503<br>H,0,-1.1635420938,1.9676412976,0.4633175318<br>N,0,-2.1187630948,-0.6644638258,0.2280731119<br>H,0,-2.7381885454,-0.0722624624,-0.3118541525<br>H,0,-2.5717072668,-0.9466600933,1.0930588873 |
| T18P3  | C,0,-0.064041629,-0.8561103616,-0.0279085722                                                                                                                                                                                                                                                                                                                                                                                                                                                                                                                                                                                                                                          |

|        |                                                                                                                                                                                                                                                                                                                                                                                                                                                                                                                                                                                                                                                                                 |
|--------|---------------------------------------------------------------------------------------------------------------------------------------------------------------------------------------------------------------------------------------------------------------------------------------------------------------------------------------------------------------------------------------------------------------------------------------------------------------------------------------------------------------------------------------------------------------------------------------------------------------------------------------------------------------------------------|
|        | C,0,1.3213891601,-0.9409897122,0.022614675<br>C,0,1.9961676961,0.261763668,0.2005650749<br>C,0,1.0484012681,1.2275185454,0.0457853121<br>C,0,-0.2946487111,1.4650651671,-0.0788092932<br>C,0,-0.9452445775,0.2441399613,0.0474476595<br>H,0,-0.4818950471,-2.1356383604,-0.1792374644<br>H,0,1.775293265,-1.9295256316,-0.1015415646<br>H,0,3.0413166286,0.4335378545,0.42316947<br>H,0,-0.4168283509,-3.0536210589,-0.2472886231<br>H,0,-0.7250453235,2.4422319484,-0.2778963803<br>N,0,-2.2999974313,0.0635632572,0.2407084651<br>H,0,-2.9102081646,0.8244064495,-0.0082485151<br>H,0,-2.6737617729,-0.8489427267,0.0342257564                                                |
| T19P15 | C,0,-0.9795880683,-1.3897697298,-0.1728173139<br>C,0,-1.7699535325,-0.2048555157,-0.1095024736<br>C,0,-1.08524146,0.9841357007,-0.0907249712<br>C,0,0.2731396196,1.086594428,0.0277837361<br>C,0,1.0274735077,-0.1238316343,-0.0375694347<br>C,0,0.3706308346,-1.3565272602,0.0426670102<br>H,0,-1.5304167223,-2.320882682,-0.2534702785<br>H,0,-2.8426277539,-0.2804642265,-0.0231920165<br>H,0,-1.7841777392,2.0222810233,0.083996514<br>H,0,0.7996602887,2.0312009318,0.0499180141<br>H,0,-2.033763281,2.2166092335,0.9532882276<br>N,0,2.3906903378,-0.0525905845,-0.2156850687<br>H,0,2.8683750026,0.8009828957,0.0209417553<br>H,0,2.8976909861,-0.90216959,-0.0358037001 |
| T20P11 | C,0,-0.0724088187,0.795886786,-1.7322683512<br>C,0,0.6407877965,0.2382999916,-0.6766489876<br>C,0,0.2803940323,0.126070242,0.6545982025<br>C,0,-0.8852721885,0.7519457624,1.0572831956<br>C,0,-1.6885987007,1.3066975212,0.039750776<br>C,0,-1.2159329628,1.3881453789,-1.2748296152<br>H,0,0.3281068274,0.8921323024,-2.7344294792<br>H,0,1.6969894004,-1.1248347957,-0.9377759002<br>H,0,0.9130194144,-0.4043992216,1.3513662861<br>H,0,-1.1936586374,0.742545618,2.0982617952<br>H,0,1.8010132915,-0.238177576,-0.940702192<br>N,0,-2.9527051574,1.7837006337,0.3274755874<br>H,0,-3.4454387415,1.3919453208,1.1128537524<br>H,0,-3.5234439356,2.0021635862,-0.4737366098    |
| PR1    | C,0,-0.7236306838,-1.3961895392,0.4746996686<br>C,0,0.6877921878,-1.5187409659,0.8562050566<br>C,0,1.306248335,-0.3485942258,0.8689822204<br>C,0,1.0360286985,0.844410386,0.3770268267<br>C,0,-0.1809058581,0.8436672644,-0.4942068629<br>C,0,-1.0812108752,-0.31297609,-0.2480237256                                                                                                                                                                                                                                                                                                                                                                                           |

|     |                                                                                                                                                                                                                                                                                                                                                                                                                                                                                                                                                                                      |
|-----|--------------------------------------------------------------------------------------------------------------------------------------------------------------------------------------------------------------------------------------------------------------------------------------------------------------------------------------------------------------------------------------------------------------------------------------------------------------------------------------------------------------------------------------------------------------------------------------|
|     | H,0,-1.3949070332,-2.2387746541,0.586675352<br>H,0,1.1785162005,-2.4810609782,0.7833959792<br>H,0,1.3727771912,1.795927752,0.7635046925<br>H,0,-2.0559995214,-0.2701733817,-0.7181590761<br>N,0,-0.4855920762,1.8827756128,-1.1777084014<br>H,0,-1.4565980051,1.8507340298,-1.4909883601                                                                                                                                                                                                                                                                                             |
| PR2 | C,0,2.8296286142,-1.2198145889,-0.2020948211<br>C,0,4.1920002502,-0.8934817237,-0.0723415825<br>C,0,4.3146452153,0.4684079101,0.0833306536<br>C,0,3.9375092387,1.7526711676,0.1959513927<br>C,0,2.8137026117,1.033588736,0.040303675<br>C,0,2.0159155319,-0.0740757348,-0.1347226158<br>H,0,2.453715777,-2.2284029961,-0.3371551139<br>H,0,5.0088259599,-1.5982884548,-0.0918507205<br>H,0,4.3125318975,2.7588711922,0.3306918567<br>H,0,0.9394271116,-0.0659539094,-0.208506705                                                                                                     |
| PR3 | C,0,-1.1356455077,0.5641228105,0.1019257059<br>C,0,-2.1380160768,-0.3365400206,0.0706991439<br>C,0,-0.9588290172,-0.9848621049,-0.0047624514<br>C,0,0.3893024652,-1.2191991078,-0.0564615546<br>C,0,1.0627886891,0.033722716,0.0063518274<br>C,0,0.1241019944,1.100317385,0.1006936734<br>H,0,-3.210604935,-0.4604875215,0.0923092861<br>H,0,0.8741091221,-2.1808510137,-0.1356419891<br>H,0,0.3791058635,2.1480785469,0.1580201109<br>N,0,2.4164724387,0.1926309872,-0.0559305011<br>H,0,3.007833994,-0.6066571677,0.0882814843<br>H,0,2.8152469696,1.0779744908,0.2019722643       |
| PR4 | C,0,1.0410785751,1.1435595221,-0.0284365311<br>C,0,1.9929169469,0.1541951135,-0.0138617955<br>C,0,1.3174101758,-1.084111578,0.0073160183<br>C,0,-0.0753981167,-1.192309989,0.0100980779<br>C,0,-0.9296788308,-0.0620928914,-0.0081162986<br>C,0,-0.1989224922,1.12258577,-0.0254885693<br>H,0,3.0662425409,0.2498134551,-0.0174175495<br>H,0,1.9087593052,-1.9922327901,0.0215980598<br>H,0,-0.521492121,-2.1802649832,0.0309386964<br>N,0,-2.3062824185,-0.1559737287,0.0450427736<br>H,0,-2.8193202948,0.6534222027,-0.2615330573<br>H,0,-2.7154082698,-1.0304861029,-0.2401308245 |
| PR5 | C,0,2.6720385271,-0.5314829567,-0.0268832156<br>C,0,4.0390774335,-0.3214843991,-0.2529171048<br>C,0,4.7289321329,0.789021893,0.2681296481<br>C,0,3.8704886947,1.5849502297,0.9966653193<br>C,0,2.6601547885,1.3990240111,1.1967887239<br>C,0,1.8883642043,0.3526662304,0.7378051003<br>H,0,2.1980891647,-1.406100603,-0.4554589233                                                                                                                                                                                                                                                   |

|     |                                                                                                                                                                                                                                                                                                                                                                                                                                                                                                                                                                                    |
|-----|------------------------------------------------------------------------------------------------------------------------------------------------------------------------------------------------------------------------------------------------------------------------------------------------------------------------------------------------------------------------------------------------------------------------------------------------------------------------------------------------------------------------------------------------------------------------------------|
|     | H,0,5.7822945776,0.9524445863,0.0949785401<br>H,0,0.8348514154,0.1924399345,0.9130165743<br>H,0,4.5879129391,-1.0389862924,-0.8506058059                                                                                                                                                                                                                                                                                                                                                                                                                                           |
| PR6 | C,0,-1.1668731815,1.1606060244,-0.0768348995<br>C,0,-0.0131924095,1.1127243713,-0.8051623707<br>C,0,0.8504001739,2.2151763017,-0.6795896731<br>C,0,0.314361638,3.5051332925,-0.502664159<br>C,0,-0.8296878464,3.5977622584,0.2346542036<br>C,0,-1.6014223016,2.4020419238,0.5496670513<br>H,0,-1.7499861932,0.2741899461,0.138289629<br>H,0,0.3192459298,0.1878846342,-1.2611513051<br>H,0,0.8885660426,4.3876960525,-0.7590708318<br>H,0,-1.1551023994,4.5422302302,0.6567593327<br>N,0,-2.6515898545,2.3744170948,1.3055859308<br>H,0,-2.8629868182,3.3055222301,1.6677011919    |
| PR7 | C,0,-0.2674214085,1.1904913679,0.0063540535<br>C,0,1.2111377485,1.1904276056,-0.003621441<br>C,0,1.8214902298,-0.0000157843,-0.0076445664<br>C,0,1.2110841051,-1.1904316021,-0.0036211125<br>C,0,-0.2674742698,-1.1904284345,0.0063543252<br>C,0,-0.8778223935,0.0000444164,0.0103859824<br>H,0,-0.7204435233,2.1706081646,0.0094072717<br>H,0,1.6641981021,2.1705252119,-0.0066634315<br>H,0,1.6641009016,-2.1705492739,-0.0066628968<br>H,0,-0.720540492,-2.1705246717,0.0094078154                                                                                              |
| PR8 | C,0,-0.6616730985,-0.4093597935,1.3872856736<br>C,0,-0.5401835121,1.033708136,1.3869038127<br>C,0,-0.5262306441,1.0921163951,-0.0003927053<br>C,0,-0.5213145045,1.0305270519,-1.3875800762<br>C,0,-0.6425184507,-0.4120384534,-1.3866982185<br>C,0,-0.6573121594,-0.46999552,0.0006336472<br>H,0,-0.7294861065,-1.1507766225,2.1756182985<br>H,0,-0.4826708459,1.7770288403,2.1743005064<br>H,0,-0.4534064188,1.7721454521,-2.1757268518<br>H,0,-0.6993452789,-1.155114485,-2.1743440949                                                                                           |
| PR9 | C,0,-2.0715946396,0.0344807708,0.1945360644<br>C,0,-0.6267236103,0.2149536903,0.1871279939<br>C,0,-0.1400168773,1.4774438247,0.097333936<br>C,0,-1.0165713793,2.5785981315,-0.1178448836<br>C,0,-2.3818343729,2.4021663193,-0.3549256534<br>C,0,-2.8873180553,1.2195312625,0.1280502392<br>H,0,0.0007728295,-0.6644954558,0.12152113<br>H,0,0.9258857482,1.6641789837,0.1113539077<br>H,0,-0.6219485847,3.5854140804,-0.0294255036<br>H,0,-3.0095071464,3.2484586547,-0.6073613437<br>N,0,-2.5779367676,-1.1612721146,0.1306273846<br>H,0,-3.5976287543,-1.0915195674,0.1400501985 |

|      |                                                                                                                                                                                                                                                                                                                                                                                                                                                                                                                                                                                     |
|------|-------------------------------------------------------------------------------------------------------------------------------------------------------------------------------------------------------------------------------------------------------------------------------------------------------------------------------------------------------------------------------------------------------------------------------------------------------------------------------------------------------------------------------------------------------------------------------------|
| PR10 | C,0,0.9670923503,1.2937380232,-0.875514467<br>C,0,2.3261463895,1.3210790169,-0.5387839987<br>C,0,2.5078023821,1.1379741881,0.8181228665<br>C,0,1.6104268402,0.9824100949,1.6590842967<br>C,0,0.252205495,0.9418648046,1.4541827326<br>C,0,-0.058436232,1.1107096402,0.0819767138<br>H,0,0.6864362982,1.4101857107,-1.9157310434<br>H,0,-0.519376927,0.8032178961,2.1992785984<br>H,0,3.0967065124,1.4643089342,-1.282372759<br>N,0,-1.3895070776,1.0407206846,-0.3383259653<br>H,0,-1.6048346847,1.5311187291,-1.1915330761<br>H,0,-2.0778486165,1.2153599574,0.3765951714          |
| PR11 | C,0,-0.1174821904,0.0363015566,-0.2230097129<br>C,0,1.0512000493,0.0684689028,0.5479139518<br>C,0,1.3345493733,1.3189195326,1.0192942124<br>C,0,1.0409025504,2.6235827381,1.1201668203<br>C,0,-0.0035707868,2.2738414661,0.3458774224<br>C,0,-0.7088847008,1.3075046804,-0.3343603972<br>H,0,-0.5249284473,-0.8624478288,-0.6766048967<br>H,0,1.6626816834,-0.7975332717,0.7572762075<br>H,0,-2.06758059,0.97749141,-1.8190788524<br>H,0,1.4340983993,3.5148527522,1.5889951107<br>N,0,-1.9262816723,1.552081588,-1.001257872<br>H,0,-2.069812348,2.5248662938,-1.224859544         |
| PR12 | C,0,-0.7476544234,-0.7892602722,-1.4224051956<br>C,0,0.567064111,-0.8265421214,-0.9188949722<br>C,0,0.7979833424,0.2237599807,-0.0096536313<br>C,0,-0.3664298892,0.9624604602,0.0912877806<br>C,0,-1.6322223977,1.3792088792,-0.0946381041<br>C,0,-1.3927056949,0.2897519119,-0.8469615124<br>H,0,-1.1747059046,-1.481951456,-2.1301592605<br>H,0,1.3059676408,-1.5692135411,-1.1946644059<br>H,0,1.7201743624,0.4155528534,0.5155847821<br>N,0,-2.5746583283,2.2780544908,0.2924750252<br>H,0,-2.2450008656,3.1225895245,0.730817537<br>H,0,-3.3784002629,2.38054102,-0.3054865929 |
| PR15 | C,0,1.8485924324,-0.6976491662,0.6568264094<br>C,0,0.8883321228,-0.5342638688,1.5642448859<br>C,0,0.2948495275,0.8241835722,1.7879839602<br>C,0,0.8794365719,1.800925626,1.1027241737<br>C,0,1.8896407526,1.6981499976,0.2413648309<br>C,0,2.4281526209,0.3381603462,-0.0225862267<br>H,0,2.55392603,2.5053385655,-0.0428900297<br>H,0,0.2944481498,-1.329858072,1.9965275394<br>H,0,-0.6847363972,0.8238940544,2.2425048881<br>N,0,3.5611225523,0.2470401177,-0.7852924538<br>H,0,4.1633740938,-0.5432318273,-0.627566617                                                          |

|  |                                             |
|--|---------------------------------------------|
|  | H,0,4.0125105333,1.0930012448,-1.0882366903 |
|--|---------------------------------------------|



**Table S3.** Gibbs free energies ( $\Delta G$ ) in kcal/mol using CCSD(T)//B3LYP/6-311++G(3df,2p) and Entropies ( $\Delta S$ ) in cal/mol.K using B3LYP/6-311++G(3df,2p) of the  $C_6H_5 + NH_2$  reaction at 298.15 K.

| Channels                         | $\Delta G$ (kcal/mol) | $\Delta S$ (cal/mol.K) |
|----------------------------------|-----------------------|------------------------|
| $C_6H_5 + NH_2 \rightarrow PR1$  | -3.42                 | -9.36                  |
| $C_6H_5 + NH_2 \rightarrow PR2$  | -11.15                | -1.41                  |
| $C_6H_5 + NH_2 \rightarrow PR3$  | -3.29                 | -8.55                  |
| $C_6H_5 + NH_2 \rightarrow PR4$  | -13.61                | -8.73                  |
| $C_6H_5 + NH_2 \rightarrow PR5$  | -25.01                | -1.80                  |
| $C_6H_5 + NH_2 \rightarrow PR6$  | 8.14                  | -9.65                  |
| $C_6H_5 + NH_2 \rightarrow PR7$  | 2.84                  | 0.86                   |
| $C_6H_5 + NH_2 \rightarrow PR8$  | 32.14                 | 0.82                   |
| $C_6H_5 + NH_2 \rightarrow PR9$  | 7.53                  | -9.13                  |
| $C_6H_5 + NH_2 \rightarrow PR10$ | -10.34                | -8.33                  |
| $C_6H_5 + NH_2 \rightarrow PR11$ | 4.87                  | -5.91                  |
| $C_6H_5 + NH_2 \rightarrow PR12$ | -4.50                 | -8.36                  |
| $C_6H_5 + NH_2 \rightarrow PR15$ | 21.13                 | -7.52                  |

**Table S4.** Predicted rate constants ( $\text{cm}^3 \text{ molecule}^{-1} \text{ s}^{-1}$ ) for the  $\text{C}_6\text{H}_5 + \text{NH}_2 \rightarrow \text{C}_6\text{H}_5\text{NH}_2$  process in the temperature and pressure ranges of 300-2000 K and 1-76,000 Torr, respectively.  $K_{\text{eq}}$  ( $\text{cm}^3 \text{ molecule}^{-1}$ ).

| T<br>(K) | 1 Torr<br>$k_{01}$     | 10 Torr<br>$k_{02}$    | 100 Torr<br>$k_{03}$   | 760 Torr<br>$k_{04}$   | 7,600 Torr<br>$k_{05}$ | 76,000 Torr,<br>$k_{06}$ | High-P<br>$K_{\text{eq}}$ |
|----------|------------------------|------------------------|------------------------|------------------------|------------------------|--------------------------|---------------------------|
| 300      | $1.37 \times 10^{-9}$    | $1.18 \times 10^{48}$     |
| 400      | $1.47 \times 10^{-9}$    | $1.44 \times 10^{29}$     |
| 500      | $1.54 \times 10^{-9}$    | $6.77 \times 10^{17}$     |
| 600      | $1.58 \times 10^{-9}$  | $1.60 \times 10^{-9}$    | $1.98 \times 10^{10}$     |
| 700      | $1.55 \times 10^{-9}$  | $1.62 \times 10^{-9}$  | $1.64 \times 10^{-9}$  | $1.64 \times 10^{-9}$  | $1.64 \times 10^{-9}$  | $1.64 \times 10^{-9}$    | $8.52 \times 10^4$        |
| 800      | $1.38 \times 10^{-9}$  | $1.58 \times 10^{-9}$  | $1.65 \times 10^{-9}$  | $1.66 \times 10^{-9}$  | $1.67 \times 10^{-9}$  | $1.67 \times 10^{-9}$    | $8.34 \times 10^0$        |
| 900      | $1.07 \times 10^{-9}$  | $1.43 \times 10^{-9}$  | $1.62 \times 10^{-9}$  | $1.67 \times 10^{-9}$  | $1.68 \times 10^{-9}$  | $1.68 \times 10^{-9}$    | $6.52 \times 10^{-3}$     |
| 1000     | $7.28 \times 10^{-10}$ | $1.17 \times 10^{-9}$  | $1.50 \times 10^{-9}$  | $1.64 \times 10^{-9}$  | $1.69 \times 10^{-9}$  | $1.69 \times 10^{-9}$    | $2.19 \times 10^{-5}$     |
| 1100     | $4.33 \times 10^{-10}$ | $8.51 \times 10^{-10}$ | $1.29 \times 10^{-9}$  | $1.55 \times 10^{-9}$  | $1.67 \times 10^{-9}$  | $1.69 \times 10^{-9}$    | $2.11 \times 10^{-7}$     |
| 1200     | $1.65 \times 10^{-10}$ | $5.05 \times 10^{-10}$ | $9.91 \times 10^{-10}$ | $1.37 \times 10^{-9}$  | $1.61 \times 10^{-9}$  | $1.68 \times 10^{-9}$    | $4.49 \times 10^{-9}$     |
| 1300     | $4.63 \times 10^{-12}$ | $4.20 \times 10^{-11}$ | $2.89 \times 10^{-10}$ | $8.68 \times 10^{-10}$ | $1.44 \times 10^{-9}$  | $1.65 \times 10^{-9}$    | $1.75 \times 10^{-10}$    |
| 1400     | $7.02 \times 10^{-14}$ | $7.01 \times 10^{-13}$ | $6.93 \times 10^{-12}$ | $5.04 \times 10^{-11}$ | $3.81 \times 10^{-10}$ | $1.22 \times 10^{-9}$    | $1.11 \times 10^{-11}$    |
| 1500     | $1.57 \times 10^{-15}$ | $1.57 \times 10^{-14}$ | $1.57 \times 10^{-13}$ | $1.19 \times 10^{-12}$ | $1.18 \times 10^{-11}$ | $1.11 \times 10^{-10}$   | $1.02 \times 10^{-12}$    |
| 1600     | $5.00 \times 10^{-17}$ | $5.00 \times 10^{-16}$ | $5.00 \times 10^{-15}$ | $3.80 \times 10^{-14}$ | $3.80 \times 10^{-13}$ | $3.79 \times 10^{-12}$   | $1.28 \times 10^{-13}$    |
| 1700     | $2.13 \times 10^{-18}$ | $2.13 \times 10^{-17}$ | $2.13 \times 10^{-16}$ | $1.62 \times 10^{-15}$ | $1.62 \times 10^{-14}$ | $1.62 \times 10^{-13}$   | $2.07 \times 10^{-14}$    |
| 1800     | $1.17 \times 10^{-19}$ | $1.17 \times 10^{-18}$ | $1.17 \times 10^{-17}$ | $8.90 \times 10^{-17}$ | $8.90 \times 10^{-16}$ | $8.90 \times 10^{-15}$   | $4.13 \times 10^{-15}$    |
| 1900     | $7.97 \times 10^{-21}$ | $7.97 \times 10^{-20}$ | $7.97 \times 10^{-19}$ | $6.06 \times 10^{-18}$ | $6.06 \times 10^{-17}$ | $6.06 \times 10^{-16}$   | $9.87 \times 10^{-16}$    |
| 2000     | $6.54 \times 10^{-22}$ | $6.54 \times 10^{-21}$ | $6.54 \times 10^{-20}$ | $4.97 \times 10^{-19}$ | $4.97 \times 10^{-18}$ | $4.97 \times 10^{-17}$   | $2.74 \times 10^{-16}$    |

**Table S5.** Predicted rate constants ( $\text{cm}^3 \text{ molecule}^{-1} \text{ s}^{-1}$ ) for the decomposition process,  $\text{C}_6\text{H}_5\text{NH}_2 \rightarrow \text{C}_6\text{H}_5 + \text{NH}_2$ , in the temperature and pressure ranges of 300-2000 K and 1-76,000 Torr, respectively.

| T<br>(K) | 1 Torr<br>$k_{-01}$    | 10 Torr<br>$k_{-02}$   | 100 Torr<br>$k_{-03}$  | 760 Torr<br>$k_{-04}$  | 7,600 Torr<br>$k_{-05}$ | 76,000 Torr,<br>$k_{-06}$ | High-P<br>$k^\infty(T)$ |
|----------|------------------------|------------------------|------------------------|------------------------|-------------------------|---------------------------|-------------------------|
| 300      | $1.17 \times 10^{-57}$  | $1.17 \times 10^{-57}$    | $1.17 \times 10^{-57}$  |
| 400      | $1.02 \times 10^{-38}$  | $1.02 \times 10^{-38}$    | $1.02 \times 10^{-38}$  |
| 500      | $2.28 \times 10^{-27}$  | $2.28 \times 10^{-27}$    | $2.28 \times 10^{-27}$  |
| 600      | $8.01 \times 10^{-20}$ | $8.08 \times 10^{-20}$ | $8.09 \times 10^{-20}$ | $8.09 \times 10^{-20}$ | $8.09 \times 10^{-20}$  | $8.09 \times 10^{-20}$    | $8.09 \times 10^{-20}$  |
| 700      | $1.82 \times 10^{-14}$ | $1.90 \times 10^{-14}$ | $1.92 \times 10^{-14}$ | $1.92 \times 10^{-14}$ | $1.92 \times 10^{-14}$  | $1.92 \times 10^{-14}$    | $1.92 \times 10^{-14}$  |
| 800      | $1.65 \times 10^{-10}$ | $1.90 \times 10^{-10}$ | $1.98 \times 10^{-10}$ | $2.00 \times 10^{-10}$ | $2.00 \times 10^{-10}$  | $2.00 \times 10^{-10}$    | $2.00 \times 10^{-10}$  |
| 900      | $1.65 \times 10^{-7}$  | $2.20 \times 10^{-7}$  | $2.48 \times 10^{-7}$  | $2.56 \times 10^{-7}$  | $2.58 \times 10^{-7}$   | $2.58 \times 10^{-7}$     | $2.58 \times 10^{-7}$   |
| 1000     | $3.33 \times 10^{-5}$  | $5.35 \times 10^{-5}$  | $6.87 \times 10^{-5}$  | $7.50 \times 10^{-5}$  | $7.71 \times 10^{-5}$   | $7.74 \times 10^{-5}$     | $7.75 \times 10^{-5}$   |
| 1100     | $2.05 \times 10^{-3}$  | $4.03 \times 10^{-3}$  | $6.11 \times 10^{-3}$  | $7.34 \times 10^{-3}$  | $7.91 \times 10^{-3}$   | $8.03 \times 10^{-3}$     | $8.05 \times 10^{-3}$   |
| 1200     | $3.67 \times 10^{-2}$  | $1.12 \times 10^{-1}$  | $2.21 \times 10^{-1}$  | $3.06 \times 10^{-1}$  | $3.59 \times 10^{-1}$   | $3.75 \times 10^{-1}$     | $3.78 \times 10^{-1}$   |
| 1300     | $2.64 \times 10^{-2}$  | $2.40 \times 10^{-1}$  | $1.64 \times 10^0$     | $4.94 \times 10^0$     | $8.20 \times 10^0$      | $9.37 \times 10^0$        | $9.65 \times 10^0$      |
| 1400     | $6.36 \times 10^{-3}$  | $6.34 \times 10^{-2}$  | $6.27 \times 10^{-1}$  | $4.56 \times 10^0$     | $3.45 \times 10^1$      | $1.11 \times 10^2$        | $1.52 \times 10^2$      |
| 1500     | $1.54 \times 10^{-3}$  | $1.54 \times 10^{-2}$  | $1.54 \times 10^{-1}$  | $1.17 \times 10^0$     | $1.16 \times 10^1$      | $1.09 \times 10^2$        | $1.64 \times 10^3$      |
| 1600     | $3.91 \times 10^{-4}$  | $3.91 \times 10^{-3}$  | $3.91 \times 10^{-2}$  | $2.97 \times 10^{-1}$  | $2.97 \times 10^0$      | $2.96 \times 10^1$        | $1.30 \times 10^4$      |
| 1700     | $1.03 \times 10^{-4}$  | $1.03 \times 10^{-3}$  | $1.03 \times 10^{-2}$  | $7.84 \times 10^{-2}$  | $7.84 \times 10^{-1}$   | $7.84 \times 10^0$        | $7.93 \times 10^4$      |
| 1800     | $2.83 \times 10^{-5}$  | $2.83 \times 10^{-4}$  | $2.83 \times 10^{-3}$  | $2.15 \times 10^{-2}$  | $2.15 \times 10^{-1}$   | $2.15 \times 10^0$        | $3.91 \times 10^5$      |
| 1900     | $8.08 \times 10^{-6}$  | $8.08 \times 10^{-5}$  | $8.08 \times 10^{-4}$  | $6.14 \times 10^{-3}$  | $6.14 \times 10^{-2}$   | $6.14 \times 10^{-1}$     | $1.60 \times 10^6$      |
| 2000     | $2.39 \times 10^{-6}$  | $2.39 \times 10^{-5}$  | $2.39 \times 10^{-4}$  | $1.82 \times 10^{-3}$  | $1.82 \times 10^{-2}$   | $1.82 \times 10^{-1}$     | $5.57 \times 10^6$      |

**Table S6.** Predicted rate constants ( $\text{cm}^3 \text{ molecule}^{-1} \text{ s}^{-1}$ ) for the  $\text{C}_6\text{H}_5 + \text{NH}_2 \rightarrow \text{PR5}$  reaction in the temperature and pressure ranges of 300-2000 K and 1-76,000 Torr, respectively.

| T<br>(K) | 1 Torr<br>$k_1$        | 10 Torr<br>$k_2$       | 100 Torr<br>$k_3$      | 760 Torr<br>$k_4$      | 7,600 Torr<br>$k_5$    | 76,000 Torr<br>$k_6$   | High-P<br>$k^\infty(T)$ |
|----------|------------------------|------------------------|------------------------|------------------------|------------------------|------------------------|-------------------------|
| 300      | $1.37 \times 10^{-9}$   |
| 400      | $1.47 \times 10^{-9}$   |
| 500      | $1.54 \times 10^{-9}$  | $1.55 \times 10^{-9}$   |
| 600      | $1.58 \times 10^{-9}$  | $1.59 \times 10^{-9}$  | $1.60 \times 10^{-9}$   |
| 700      | $1.56 \times 10^{-9}$  | $1.62 \times 10^{-9}$  | $1.64 \times 10^{-9}$   |
| 800      | $1.41 \times 10^{-9}$  | $1.58 \times 10^{-9}$  | $1.65 \times 10^{-9}$  | $1.66 \times 10^{-9}$  | $1.67 \times 10^{-9}$  | $1.67 \times 10^{-9}$  | $1.67 \times 10^{-9}$   |
| 900      | $1.16 \times 10^{-9}$  | $1.44 \times 10^{-9}$  | $1.62 \times 10^{-9}$  | $1.67 \times 10^{-9}$  | $1.68 \times 10^{-9}$  | $1.68 \times 10^{-9}$  | $1.68 \times 10^{-9}$   |
| 1000     | $8.61 \times 10^{-10}$ | $1.21 \times 10^{-9}$  | $1.50 \times 10^{-9}$  | $1.64 \times 10^{-9}$  | $1.69 \times 10^{-9}$  | $1.69 \times 10^{-9}$  | $1.70 \times 10^{-9}$   |
| 1100     | $5.90 \times 10^{-10}$ | $9.06 \times 10^{-10}$ | $1.30 \times 10^{-9}$  | $1.55 \times 10^{-9}$  | $1.67 \times 10^{-9}$  | $1.69 \times 10^{-9}$  | $1.70 \times 10^{-9}$   |
| 1200     | $3.71 \times 10^{-10}$ | $5.91 \times 10^{-10}$ | $1.01 \times 10^{-9}$  | $1.38 \times 10^{-9}$  | $1.61 \times 10^{-9}$  | $1.68 \times 10^{-9}$  | $1.70 \times 10^{-9}$   |
| 1300     | $2.34 \times 10^{-10}$ | $2.93 \times 10^{-10}$ | $4.61 \times 10^{-10}$ | $9.09 \times 10^{-10}$ | $1.45 \times 10^{-9}$  | $1.64 \times 10^{-9}$  | $1.69 \times 10^{-9}$   |
| 1400     | $1.53 \times 10^{-10}$ | $1.76 \times 10^{-10}$ | $2.06 \times 10^{-10}$ | $2.52 \times 10^{-10}$ | $5.08 \times 10^{-10}$ | $1.24 \times 10^{-9}$  | $1.69 \times 10^{-9}$   |
| 1500     | $1.03 \times 10^{-10}$ | $1.13 \times 10^{-10}$ | $1.25 \times 10^{-10}$ | $1.33 \times 10^{-10}$ | $1.48 \times 10^{-10}$ | $2.33 \times 10^{-10}$ | $1.67 \times 10^{-9}$   |
| 1600     | $7.07 \times 10^{-11}$ | $7.54 \times 10^{-11}$ | $8.06 \times 10^{-11}$ | $8.41 \times 10^{-11}$ | $8.71 \times 10^{-11}$ | $9.16 \times 10^{-11}$ | $1.66 \times 10^{-9}$   |
| 1700     | $5.01 \times 10^{-11}$ | $5.23 \times 10^{-11}$ | $5.46 \times 10^{-11}$ | $5.63 \times 10^{-11}$ | $5.76 \times 10^{-11}$ | $5.85 \times 10^{-11}$ | $1.64 \times 10^{-9}$   |
| 1800     | $3.66 \times 10^{-11}$ | $3.76 \times 10^{-11}$ | $3.86 \times 10^{-11}$ | $3.94 \times 10^{-11}$ | $4.01 \times 10^{-11}$ | $4.05 \times 10^{-11}$ | $1.62 \times 10^{-9}$   |
| 1900     | $2.74 \times 10^{-11}$ | $2.79 \times 10^{-11}$ | $2.84 \times 10^{-11}$ | $2.87 \times 10^{-11}$ | $2.90 \times 10^{-11}$ | $2.93 \times 10^{-11}$ | $1.58 \times 10^{-9}$   |
| 2000     | $2.10 \times 10^{-11}$ | $2.12 \times 10^{-11}$ | $2.15 \times 10^{-11}$ | $2.16 \times 10^{-11}$ | $2.18 \times 10^{-11}$ | $2.19 \times 10^{-11}$ | $1.52 \times 10^{-9}$   |

**Table S7.** Predicted rate constants ( $\text{cm}^3 \text{ molecule}^{-1} \text{ s}^{-1}$ ) for the  $\text{C}_6\text{H}_5 + \text{NH}_2 \rightarrow \text{C}_6\text{H}_5\text{NH}_2$  reaction in the temperature and pressure ranges of 300-2000 K and 1-76,000 Torr, respectively. In which the error margins of energy about -2 kcal/mol.

| T<br>(K) | 1 Torr<br>$k_1$        | 10 Torr<br>$k_2$       | 100 Torr<br>$k_3$      | 760 Torr<br>$k_4$      | 7,600 Torr<br>$k_5$    | 76,000 Torr<br>$k_6$   | High-P<br>$k^\infty(T)$ |
|----------|------------------------|------------------------|------------------------|------------------------|------------------------|------------------------|-------------------------|
| 300      | $1.37 \times 10^{-9}$   |
| 400      | $1.47 \times 10^{-9}$   |
| 500      | $1.54 \times 10^{-9}$  | $1.55 \times 10^{-9}$   |
| 600      | $1.59 \times 10^{-9}$  | $1.60 \times 10^{-9}$   |
| 700      | $1.57 \times 10^{-9}$  | $1.63 \times 10^{-9}$  | $1.64 \times 10^{-9}$   |
| 800      | $1.42 \times 10^{-9}$  | $1.60 \times 10^{-9}$  | $1.65 \times 10^{-9}$  | $1.66 \times 10^{-9}$  | $1.67 \times 10^{-9}$  | $1.67 \times 10^{-9}$  | $1.67 \times 10^{-9}$   |
| 900      | $1.14 \times 10^{-9}$  | $1.47 \times 10^{-9}$  | $1.63 \times 10^{-9}$  | $1.67 \times 10^{-9}$  | $1.68 \times 10^{-9}$  | $1.68 \times 10^{-9}$  | $1.68 \times 10^{-9}$   |
| 1000     | $7.97 \times 10^{-10}$ | $1.23 \times 10^{-9}$  | $1.53 \times 10^{-9}$  | $1.65 \times 10^{-9}$  | $1.69 \times 10^{-9}$  | $1.69 \times 10^{-9}$  | $1.70 \times 10^{-9}$   |
| 1100     | $4.92 \times 10^{-10}$ | $9.22 \times 10^{-10}$ | $1.34 \times 10^{-9}$  | $1.57 \times 10^{-9}$  | $1.67 \times 10^{-9}$  | $1.70 \times 10^{-9}$  | $1.70 \times 10^{-9}$   |
| 1200     | $2.68 \times 10^{-10}$ | $6.17 \times 10^{-10}$ | $1.08 \times 10^{-9}$  | $1.42 \times 10^{-9}$  | $1.63 \times 10^{-9}$  | $1.69 \times 10^{-9}$  | $1.70 \times 10^{-9}$   |
| 1300     | $7.20 \times 10^{-11}$ | $3.01 \times 10^{-10}$ | $7.49 \times 10^{-10}$ | $1.19 \times 10^{-9}$  | $1.53 \times 10^{-9}$  | $1.66 \times 10^{-9}$  | $1.69 \times 10^{-9}$   |
| 1400     | $2.12 \times 10^{-12}$ | $1.99 \times 10^{-11}$ | $1.55 \times 10^{-10}$ | $6.00 \times 10^{-10}$ | $1.27 \times 10^{-9}$  | $1.59 \times 10^{-9}$  | $1.69 \times 10^{-9}$   |
| 1500     | $4.91 \times 10^{-14}$ | $4.90 \times 10^{-14}$ | $4.85 \times 10^{-12}$ | $3.54 \times 10^{-11}$ | $2.83 \times 10^{-10}$ | $1.08 \times 10^{-9}$  | $1.67 \times 10^{-9}$   |
| 1600     | $1.57 \times 10^{-15}$ | $1.57 \times 10^{-14}$ | $1.57 \times 10^{-13}$ | $1.19 \times 10^{-12}$ | $1.18 \times 10^{-11}$ | $1.10 \times 10^{-10}$ | $1.66 \times 10^{-9}$   |
| 1700     | $6.71 \times 10^{-17}$ | $6.71 \times 10^{-16}$ | $6.71 \times 10^{-15}$ | $5.10 \times 10^{-14}$ | $5.10 \times 10^{-13}$ | $5.08 \times 10^{-12}$ | $1.64 \times 10^{-9}$   |
| 1800     | $3.69 \times 10^{-18}$ | $3.69 \times 10^{-17}$ | $3.69 \times 10^{-16}$ | $2.80 \times 10^{-15}$ | $2.80 \times 10^{-14}$ | $2.80 \times 10^{-13}$ | $1.62 \times 10^{-9}$   |
| 1900     | $2.52 \times 10^{-19}$ | $2.52 \times 10^{-18}$ | $2.52 \times 10^{-17}$ | $1.91 \times 10^{-16}$ | $1.91 \times 10^{-15}$ | $1.91 \times 10^{-14}$ | $1.58 \times 10^{-9}$   |
| 2000     | $2.07 \times 10^{-20}$ | $2.07 \times 10^{-19}$ | $2.07 \times 10^{-18}$ | $1.57 \times 10^{-17}$ | $1.57 \times 10^{-16}$ | $1.57 \times 10^{-15}$ | $1.52 \times 10^{-9}$   |

**Table S8.** Predicted rate constants ( $\text{cm}^3 \text{ molecule}^{-1} \text{ s}^{-1}$ ) for the decomposition process,  $\text{C}_6\text{H}_5\text{NH}_2 \rightarrow \text{C}_6\text{H}_5 + \text{NH}_2$ , in the temperature and pressure ranges of 300-2000 K and 1-76,000 Torr, respectively. In which the error margins of energy about -2 kcal/mol.

| T<br>(K) | 1 Torr<br>$k_{-01}$    | 10 Torr<br>$k_{-02}$   | 100 Torr<br>$k_{-03}$  | 760 Torr<br>$k_{-04}$  | 7,600 Torr<br>$k_{-05}$ | 76,000 Torr,<br>$k_{-06}$ | High-P<br>$k^\infty(T)$ |
|----------|------------------------|------------------------|------------------------|------------------------|-------------------------|---------------------------|-------------------------|
| 300      | $4.07 \times 10^{-59}$  | $4.07 \times 10^{-59}$    | $4.07 \times 10^{-59}$  |
| 400      | $8.22 \times 10^{-40}$  | $8.22 \times 10^{-40}$    | $8.22 \times 10^{-40}$  |
| 500      | $3.05 \times 10^{-28}$  | $3.05 \times 10^{-28}$    | $3.05 \times 10^{-28}$  |
| 600      | $1.50 \times 10^{-20}$ | $1.51 \times 10^{-20}$ | $1.51 \times 10^{-20}$ | $1.51 \times 10^{-20}$ | $1.51 \times 10^{-20}$  | $1.51 \times 10^{-20}$    | $1.51 \times 10^{-20}$  |
| 700      | $4.37 \times 10^{-15}$ | $4.53 \times 10^{-15}$ | $4.56 \times 10^{-15}$ | $4.56 \times 10^{-15}$ | $4.56 \times 10^{-15}$  | $4.56 \times 10^{-15}$    | $4.56 \times 10^{-15}$  |
| 800      | $4.85 \times 10^{-11}$ | $5.45 \times 10^{-11}$ | $5.64 \times 10^{-11}$ | $5.67 \times 10^{-11}$ | $5.68 \times 10^{-11}$  | $5.68 \times 10^{-11}$    | $5.68 \times 10^{-11}$  |
| 900      | $5.71 \times 10^{-8}$  | $7.38 \times 10^{-8}$  | $8.17 \times 10^{-8}$  | $8.38 \times 10^{-8}$  | $8.43 \times 10^{-8}$   | $8.44 \times 10^{-8}$     | $8.44 \times 10^{-8}$   |
| 1000     | $1.33 \times 10^{-5}$  | $2.06 \times 10^{-5}$  | $2.57 \times 10^{-5}$  | $2.76 \times 10^{-5}$  | $2.82 \times 10^{-5}$   | $2.83 \times 10^{-5}$     | $2.83 \times 10^{-5}$   |
| 1100     | $9.34 \times 10^{-4}$  | $1.75 \times 10^{-3}$  | $2.55 \times 10^{-3}$  | $2.99 \times 10^{-3}$  | $3.18 \times 10^{-3}$   | $3.22 \times 10^{-3}$     | $3.23 \times 10^{-3}$   |
| 1200     | $2.58 \times 10^{-2}$  | $5.94 \times 10^{-2}$  | $1.04 \times 10^{-1}$  | $1.37 \times 10^{-1}$  | $1.57 \times 10^{-1}$   | $1.62 \times 10^{-1}$     | $1.63 \times 10^{-1}$   |
| 1300     | $1.89 \times 10^{-1}$  | $7.92 \times 10^{-1}$  | $1.97 \times 10^0$     | $3.12 \times 10^0$     | $4.02 \times 10^0$      | $4.36 \times 10^0$        | $4.45 \times 10^0$      |
| 1400     | $9.36 \times 10^{-2}$  | $8.77 \times 10^{-1}$  | $6.84 \times 10^0$     | $2.65 \times 10^1$     | $5.59 \times 10^1$      | $7.02 \times 10^1$        | $7.43 \times 10^1$      |
| 1500     | $2.46 \times 10^{-2}$  | $2.46 \times 10^{-1}$  | $2.43 \times 10^0$     | $1.78 \times 10^1$     | $1.42 \times 10^2$      | $5.41 \times 10^2$        | $8.40 \times 10^2$      |
| 1600     | $6.53 \times 10^{-3}$  | $6.53 \times 10^{-2}$  | $6.53 \times 10^{-1}$  | $4.95 \times 10^0$     | $4.90 \times 10^1$      | $4.57 \times 10^2$        | $6.92 \times 10^3$      |
| 1700     | $1.79 \times 10^{-3}$  | $1.79 \times 10^{-2}$  | $1.79 \times 10^{-1}$  | $1.36 \times 10^0$     | $1.36 \times 10^1$      | $1.36 \times 10^2$        | $4.39 \times 10^4$      |
| 1800     | $5.10 \times 10^{-4}$  | $5.10 \times 10^{-3}$  | $5.10 \times 10^{-2}$  | $3.88 \times 10^{-1}$  | $3.88 \times 10^0$      | $3.88 \times 10^1$        | $2.23 \times 10^5$      |
| 1900     | $1.50 \times 10^{-4}$  | $1.50 \times 10^{-3}$  | $1.50 \times 10^{-2}$  | $1.14 \times 10^{-1}$  | $1.14 \times 10^0$      | $1.14 \times 10^1$        | $9.42 \times 10^5$      |
| 2000     | $4.57 \times 10^{-5}$  | $4.57 \times 10^{-4}$  | $4.57 \times 10^{-3}$  | $3.47 \times 10^{-2}$  | $3.47 \times 10^{-1}$   | $3.47 \times 10^0$        | $3.37 \times 10^6$      |

**Table S9.** Predicted rate constants ( $\text{cm}^3 \text{ molecule}^{-1} \text{ s}^{-1}$ ) for the  $\text{C}_6\text{H}_5 + \text{NH}_2 \rightarrow \text{C}_6\text{H}_5\text{NH}_2$  reaction in the temperature and pressure ranges of 300-2000 K and 1-76,000 Torr, respectively. In which the error margins of energy about 2 kcal/mol.

| T<br>(K) | 1 Torr<br>$k_1$        | 10 Torr<br>$k_2$       | 100 Torr<br>$k_3$      | 760 Torr<br>$k_4$      | 7,600 Torr<br>$k_5$    | 76,000 Torr<br>$k_6$   | High-P<br>$k^\infty(T)$ |
|----------|------------------------|------------------------|------------------------|------------------------|------------------------|------------------------|-------------------------|
| 300      | $1.35 \times 10^{-9}$   |
| 400      | $1.44 \times 10^{-9}$   |
| 500      | $1.50 \times 10^{-9}$   |
| 600      | $1.52 \times 10^{-9}$  | $1.54 \times 10^{-9}$   |
| 700      | $1.47 \times 10^{-9}$  | $1.55 \times 10^{-9}$  | $1.57 \times 10^{-9}$   |
| 800      | $1.28 \times 10^{-9}$  | $1.50 \times 10^{-9}$  | $1.57 \times 10^{-9}$  | $1.59 \times 10^{-9}$  | $1.59 \times 10^{-9}$  | $1.59 \times 10^{-9}$  | $1.59 \times 10^{-9}$   |
| 900      | $9.64 \times 10^{-10}$ | $1.33 \times 10^{-9}$  | $1.53 \times 10^{-9}$  | $1.59 \times 10^{-9}$  | $1.60 \times 10^{-9}$  | $1.60 \times 10^{-9}$  | $1.60 \times 10^{-9}$   |
| 1000     | $6.33 \times 10^{-10}$ | $1.06 \times 10^{-9}$  | $1.40 \times 10^{-9}$  | $1.55 \times 10^{-9}$  | $1.60 \times 10^{-9}$  | $1.61 \times 10^{-9}$  | $1.61 \times 10^{-9}$   |
| 1100     | $3.64 \times 10^{-10}$ | $7.46 \times 10^{-10}$ | $1.17 \times 10^{-9}$  | $1.44 \times 10^{-9}$  | $1.57 \times 10^{-9}$  | $1.60 \times 10^{-9}$  | $1.61 \times 10^{-9}$   |
| 1200     | $1.07 \times 10^{-10}$ | $3.96 \times 10^{-10}$ | $8.64 \times 10^{-10}$ | $1.25 \times 10^{-9}$  | $1.50 \times 10^{-9}$  | $1.59 \times 10^{-9}$  | $1.60 \times 10^{-9}$   |
| 1300     | $2.17 \times 10^{-12}$ | $2.05 \times 10^{-11}$ | $1.64 \times 10^{-10}$ | $6.35 \times 10^{-10}$ | $1.28 \times 10^{-9}$  | $1.54 \times 10^{-9}$  | $1.60 \times 10^{-9}$   |
| 1400     | $3.42 \times 10^{-14}$ | $3.42 \times 10^{-13}$ | $3.40 \times 10^{-12}$ | $2.52 \times 10^{-11}$ | $2.14 \times 10^{-10}$ | $9.43 \times 10^{-10}$ | $1.59 \times 10^{-9}$   |
| 1500     | $8.04 \times 10^{-16}$ | $8.04 \times 10^{-15}$ | $8.03 \times 10^{-14}$ | $6.10 \times 10^{-13}$ | $6.07 \times 10^{-12}$ | $5.85 \times 10^{-11}$ | $1.57 \times 10^{-9}$   |
| 1600     | $2.66 \times 10^{-17}$ | $2.66 \times 10^{-16}$ | $2.66 \times 10^{-15}$ | $2.02 \times 10^{-14}$ | $2.02 \times 10^{-13}$ | $2.02 \times 10^{-12}$ | $1.56 \times 10^{-9}$   |
| 1700     | $1.18 \times 10^{-18}$ | $1.18 \times 10^{-17}$ | $1.18 \times 10^{-16}$ | $8.97 \times 10^{-16}$ | $8.97 \times 10^{-15}$ | $8.97 \times 10^{-14}$ | $1.54 \times 10^{-9}$   |
| 1800     | $6.70 \times 10^{-20}$ | $6.70 \times 10^{-19}$ | $6.70 \times 10^{-18}$ | $5.09 \times 10^{-17}$ | $5.09 \times 10^{-16}$ | $5.09 \times 10^{-15}$ | $1.52 \times 10^{-9}$   |
| 1900     | $4.70 \times 10^{-21}$ | $4.70 \times 10^{-20}$ | $4.70 \times 10^{-19}$ | $3.57 \times 10^{-18}$ | $3.57 \times 10^{-17}$ | $3.57 \times 10^{-16}$ | $1.48 \times 10^{-9}$   |
| 2000     | $3.96 \times 10^{-22}$ | $3.96 \times 10^{-21}$ | $3.96 \times 10^{-20}$ | $3.01 \times 10^{-19}$ | $3.01 \times 10^{-18}$ | $3.01 \times 10^{-17}$ | $1.44 \times 10^{-9}$   |

**Table S10.** Predicted rate constants ( $\text{cm}^3 \text{ molecule}^{-1} \text{ s}^{-1}$ ) for the decomposition process,  $\text{C}_6\text{H}_5\text{NH}_2 \rightarrow \text{C}_6\text{H}_5 + \text{NH}_2$ , in the temperature and pressure ranges of 300-2000 K and 1-76,000 Torr, respectively. In which the error margins of energy about 2 kcal/mol.

| T<br>(K) | 1 Torr<br>$k_{-01}$    | 10 Torr<br>$k_{-02}$   | 100 Torr<br>$k_{-03}$  | 760 Torr<br>$k_{-04}$  | 7,600 Torr<br>$k_{-05}$ | 76,000 Torr,<br>$k_{-06}$ | High-P<br>$k^\infty(T)$ |
|----------|------------------------|------------------------|------------------------|------------------------|-------------------------|---------------------------|-------------------------|
| 300      | $3.30 \times 10^{-56}$  | $3.30 \times 10^{-56}$    | $3.30 \times 10^{-56}$  |
| 400      | $1.23 \times 10^{-37}$  | $1.23 \times 10^{-37}$    | $1.23 \times 10^{-37}$  |
| 500      | $1.66 \times 10^{-26}$  | $1.66 \times 10^{-26}$    | $1.66 \times 10^{-26}$  |
| 600      | $4.12 \times 10^{-19}$ | $4.17 \times 10^{-19}$ | $4.18 \times 10^{-19}$ | $4.18 \times 10^{-19}$ | $4.18 \times 10^{-19}$  | $4.18 \times 10^{-19}$    | $4.18 \times 10^{-19}$  |
| 700      | $7.26 \times 10^{-14}$ | $7.66 \times 10^{-14}$ | $7.76 \times 10^{-14}$ | $7.77 \times 10^{-14}$ | $7.77 \times 10^{-14}$  | $7.77 \times 10^{-14}$    | $7.77 \times 10^{-14}$  |
| 800      | $5.38 \times 10^{-10}$ | $6.31 \times 10^{-10}$ | $6.64 \times 10^{-10}$ | $6.71 \times 10^{-10}$ | $6.72 \times 10^{-10}$  | $6.72 \times 10^{-10}$    | $6.72 \times 10^{-10}$  |
| 900      | $4.52 \times 10^{-07}$ | $6.23 \times 10^{-07}$ | $7.16 \times 10^{-07}$ | $7.44 \times 10^{-07}$ | $7.51 \times 10^{-07}$  | $7.52 \times 10^{-07}$    | $7.52 \times 10^{-07}$  |
| 1000     | $7.92 \times 10^{-05}$ | $1.32 \times 10^{-04}$ | $1.75 \times 10^{-04}$ | $1.93 \times 10^{-04}$ | $2.00 \times 10^{-04}$  | $2.01 \times 10^{-04}$    | $2.01 \times 10^{-04}$  |
| 1100     | $4.30 \times 10^{-03}$ | $8.83 \times 10^{-03}$ | $1.39 \times 10^{-02}$ | $1.70 \times 10^{-02}$ | $1.86 \times 10^{-02}$  | $1.90 \times 10^{-02}$    | $1.90 \times 10^{-02}$  |
| 1200     | $5.49 \times 10^{-02}$ | $2.04 \times 10^{-01}$ | $4.45 \times 10^{-01}$ | $6.44 \times 10^{-01}$ | $7.75 \times 10^{-01}$  | $8.18 \times 10^{-01}$    | $8.27 \times 10^{-01}$  |
| 1300     | $2.68 \times 10^{-02}$ | $2.54 \times 10^{-01}$ | $2.02 \times 10^0$     | $7.85 \times 10^0$     | $1.58 \times 10^1$      | $1.90 \times 10^1$        | $1.97 \times 10^1$      |
| 1400     | $6.36 \times 10^{-03}$ | $6.35 \times 10^{-02}$ | $6.31 \times 10^{-01}$ | $4.68 \times 10^0$     | $3.98 \times 10^1$      | $1.75 \times 10^2$        | $2.94 \times 10^2$      |
| 1500     | $1.54 \times 10^{-03}$ | $1.54 \times 10^{-02}$ | $1.54 \times 10^{-01}$ | $1.17 \times 10^0$     | $1.17 \times 10^1$      | $1.12 \times 10^2$        | $3.02 \times 10^3$      |
| 1600     | $3.91 \times 10^{-04}$ | $3.91 \times 10^{-03}$ | $3.91 \times 10^{-02}$ | $2.97 \times 10^{-01}$ | $2.97 \times 10^0$      | $2.96 \times 10^1$        | $2.29 \times 10^4$      |
| 1700     | $1.03 \times 10^{-04}$ | $1.03 \times 10^{-03}$ | $1.03 \times 10^{-02}$ | $7.84 \times 10^{-02}$ | $7.84 \times 10^{-01}$  | $7.84 \times 10^0$        | $1.35 \times 10^5$      |
| 1800     | $2.83 \times 10^{-05}$ | $2.83 \times 10^{-04}$ | $2.83 \times 10^{-03}$ | $2.15 \times 10^{-02}$ | $2.15 \times 10^{-01}$  | $2.15 \times 10^0$        | $6.42 \times 10^5$      |
| 1900     | $8.08 \times 10^{-06}$ | $8.08 \times 10^{-05}$ | $8.08 \times 10^{-04}$ | $6.14 \times 10^{-03}$ | $6.14 \times 10^{-02}$  | $6.14 \times 10^{-01}$    | $2.55 \times 10^6$      |
| 2000     | $2.39 \times 10^{-06}$ | $2.39 \times 10^{-05}$ | $2.39 \times 10^{-04}$ | $1.82 \times 10^{-03}$ | $1.82 \times 10^{-02}$  | $1.82 \times 10^{-01}$    | $8.68 \times 10^6$      |



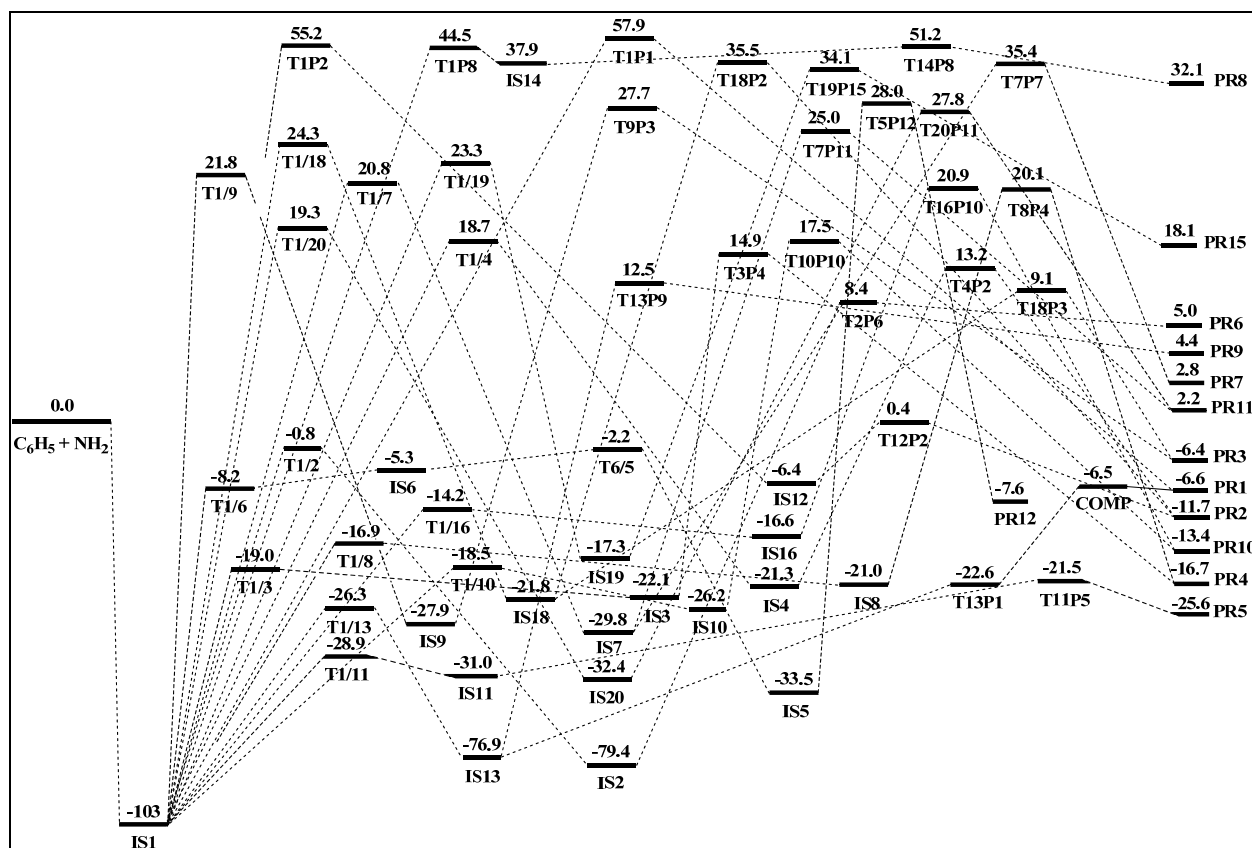

**Figure S1.** Detailed potential energy surface of the  $C_6H_5 + NH_2$  system. Energies are in units of kcal/mol calculated at the B3LYP/6311++G(3df,2p) + ZPVE level.

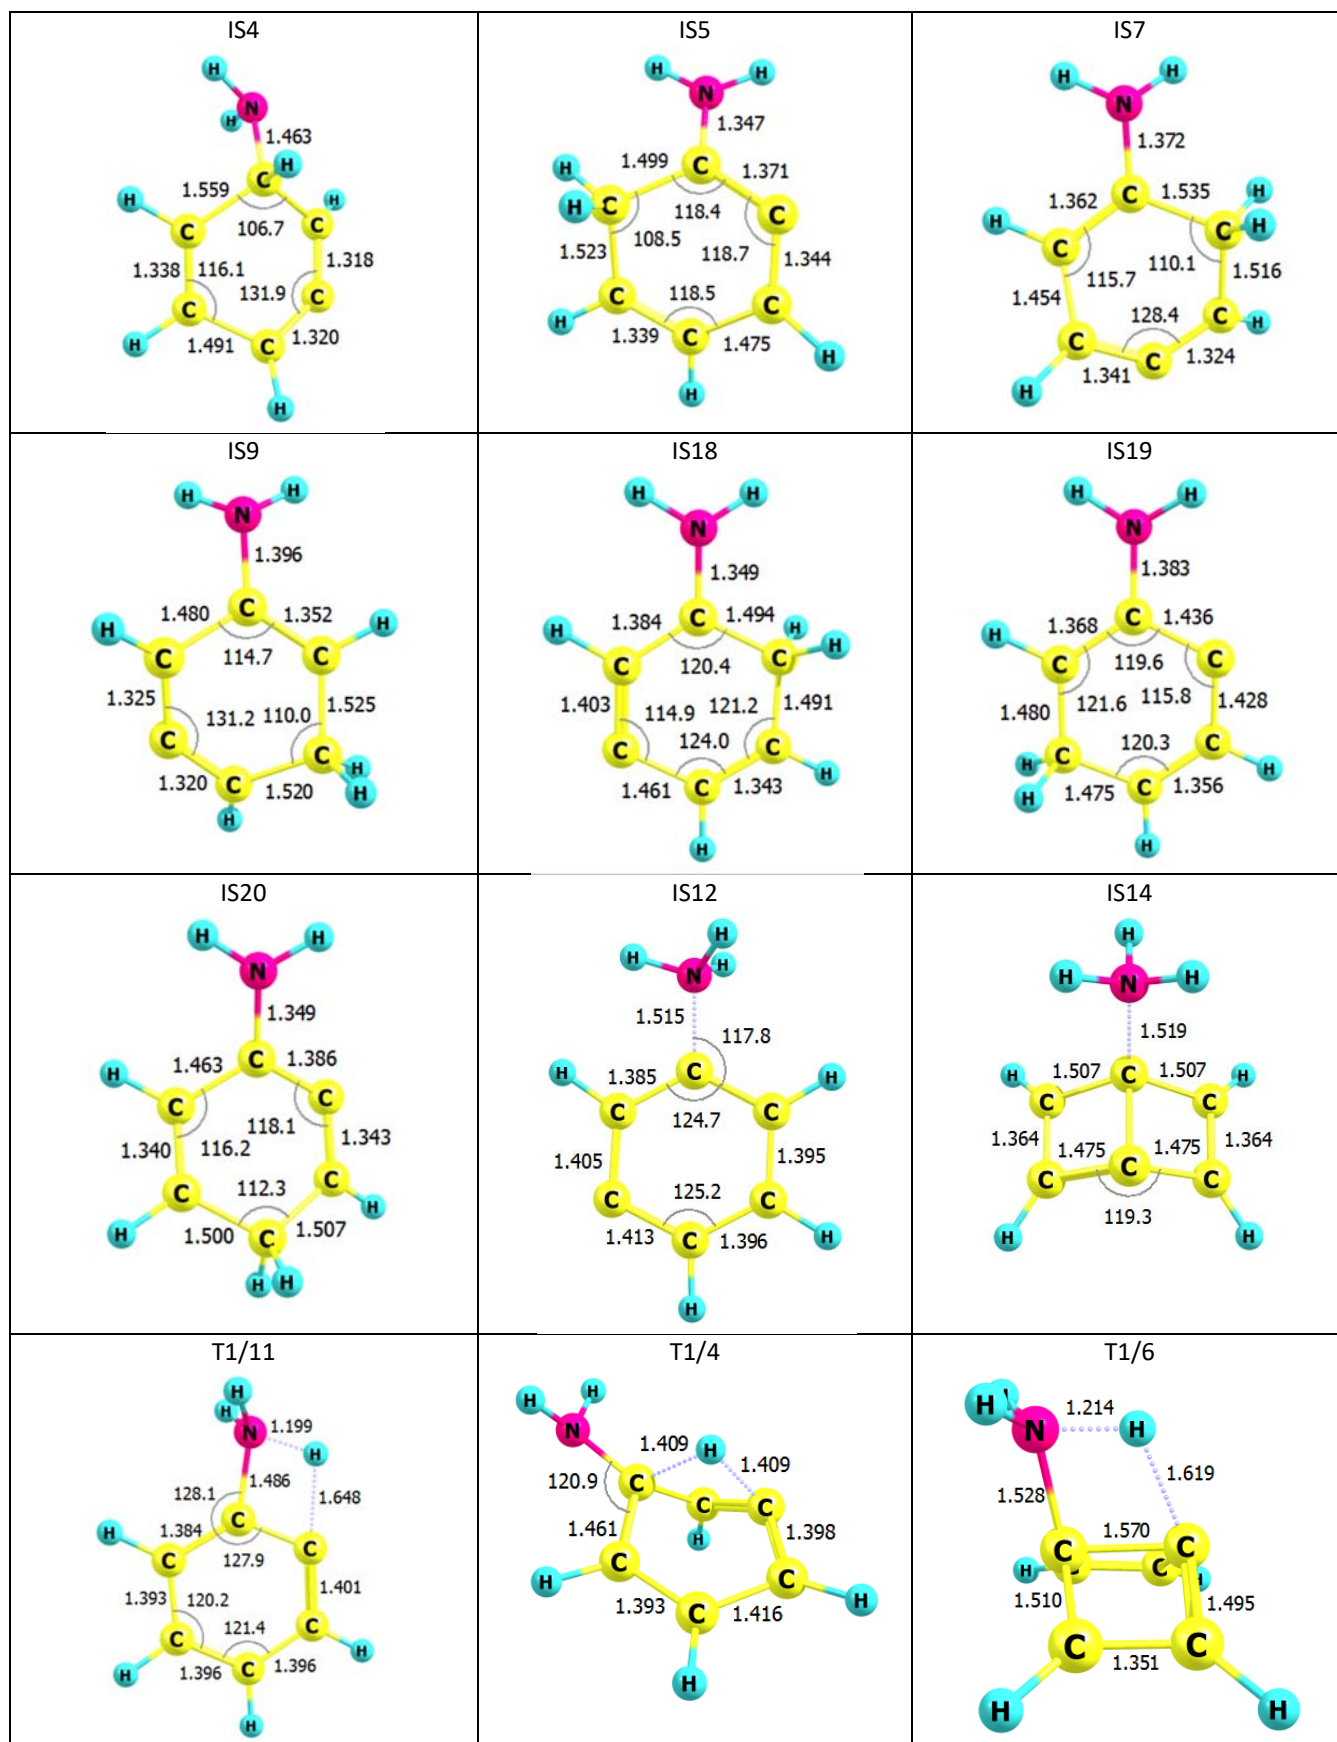

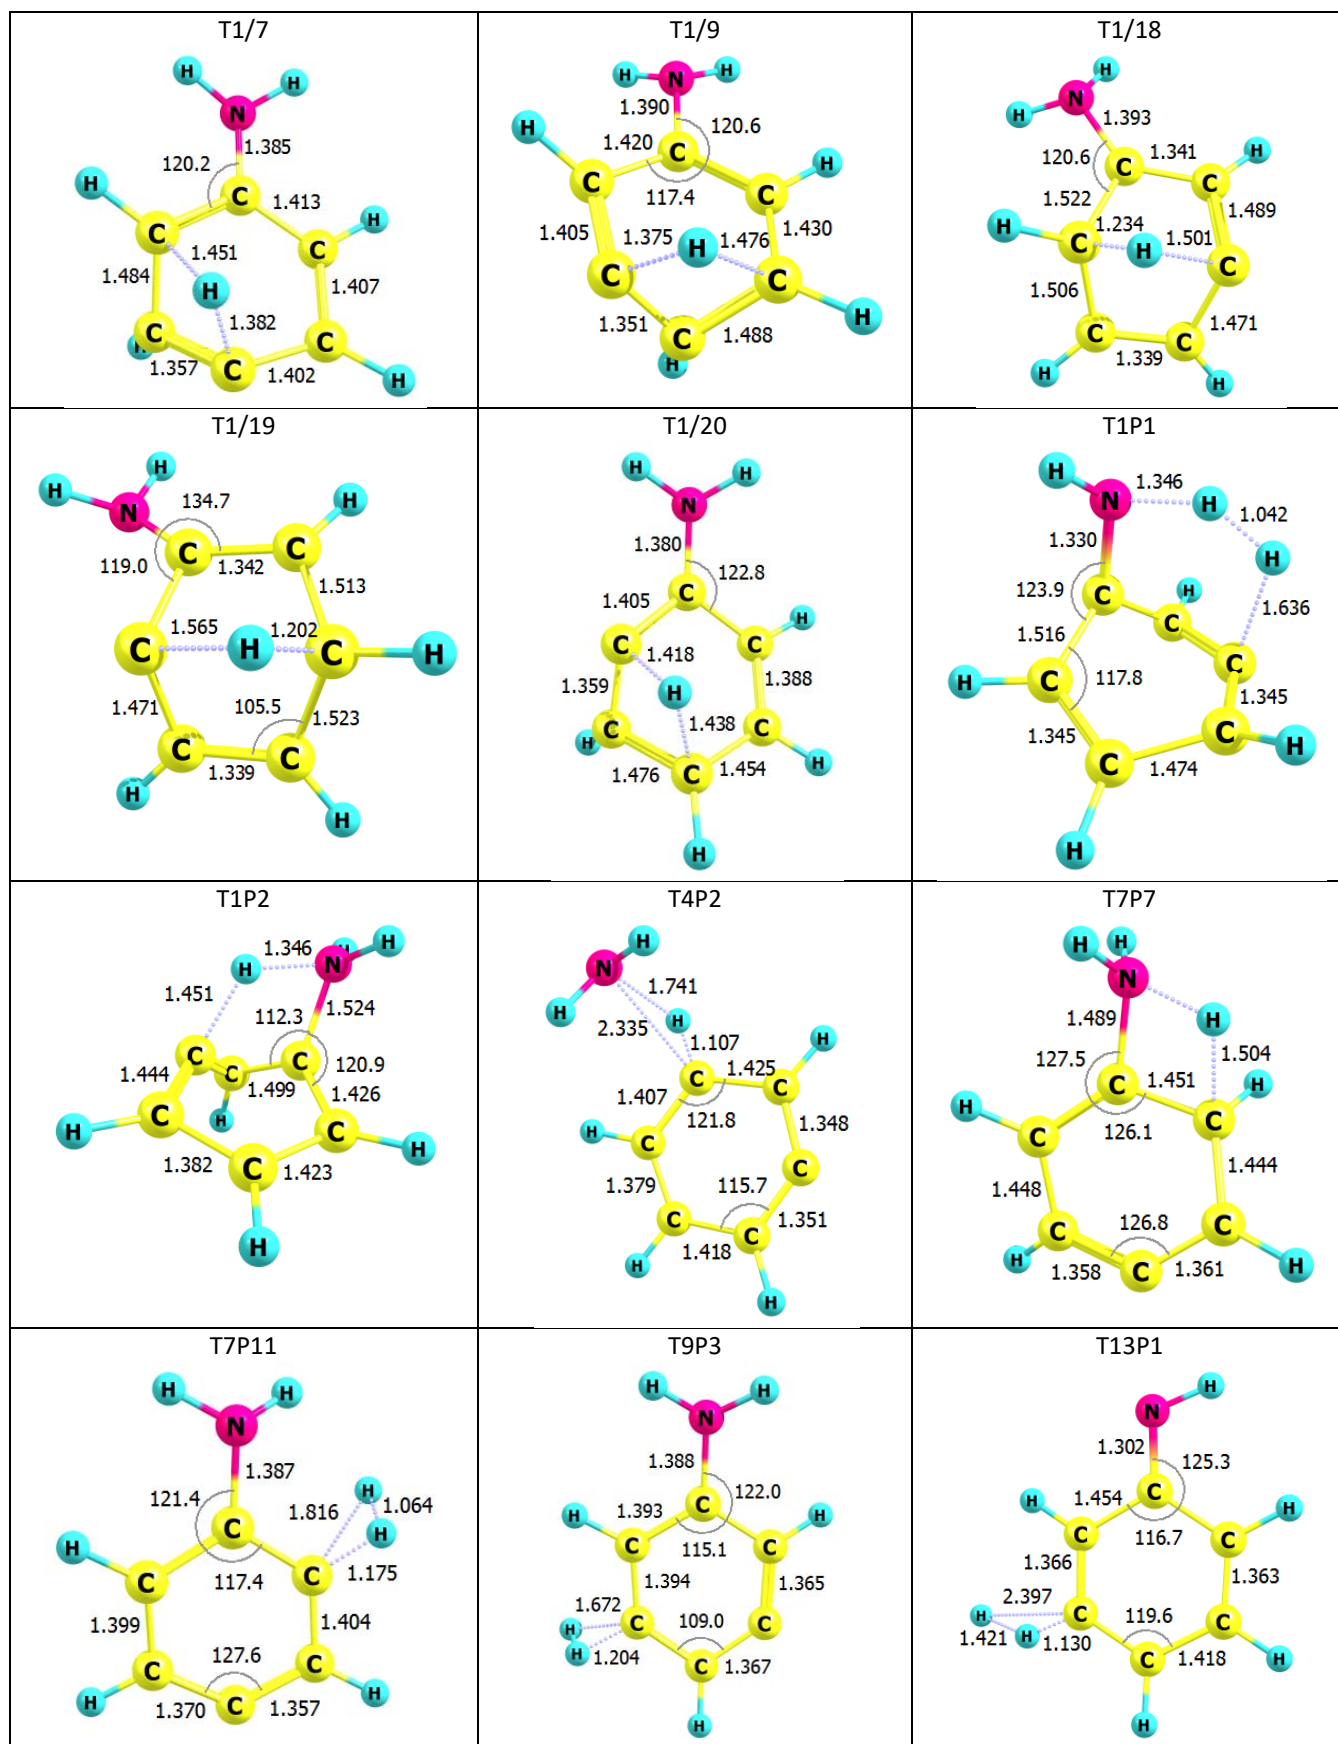

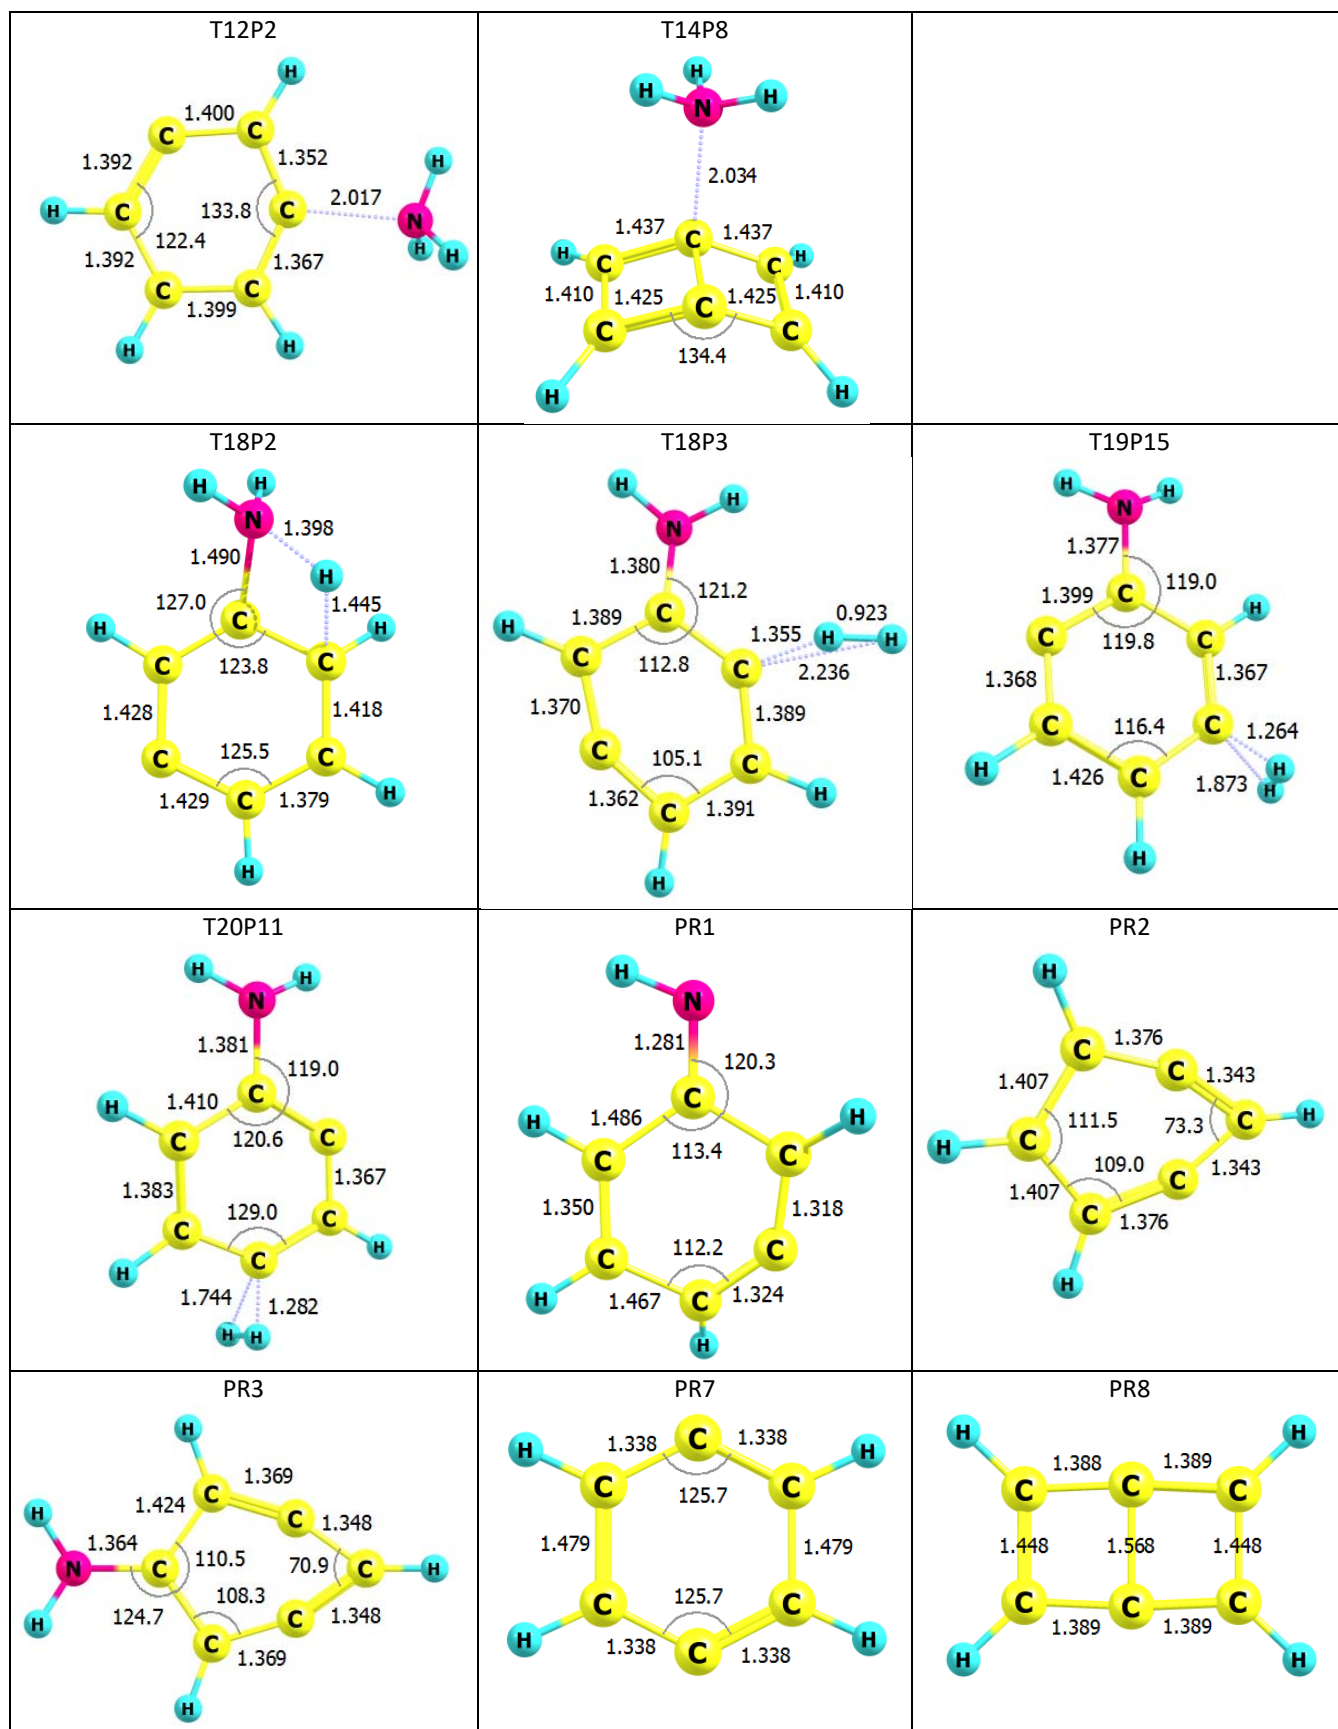

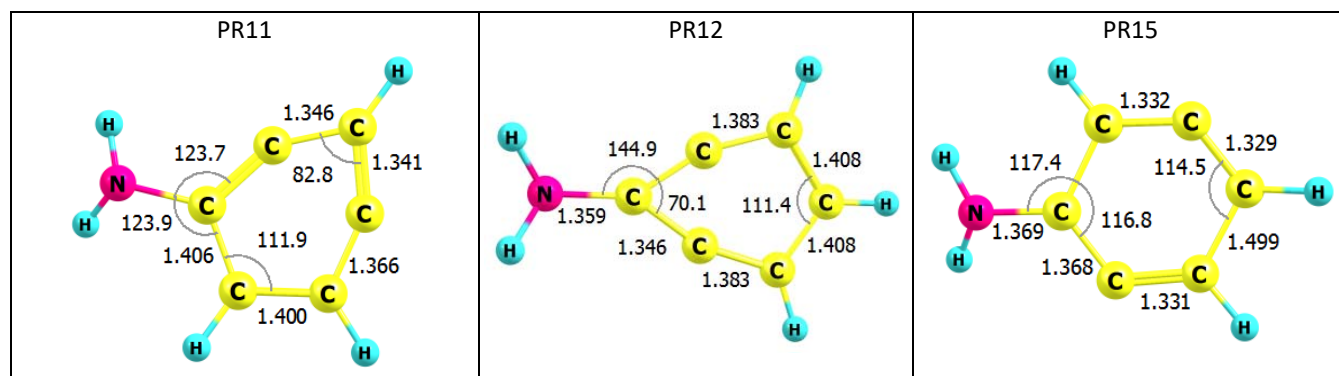

**Figure S2.** Geometries of the reactants, intermediate states, transition states and products optimized at the B3LYP/6-311++G(3df,2p) level.

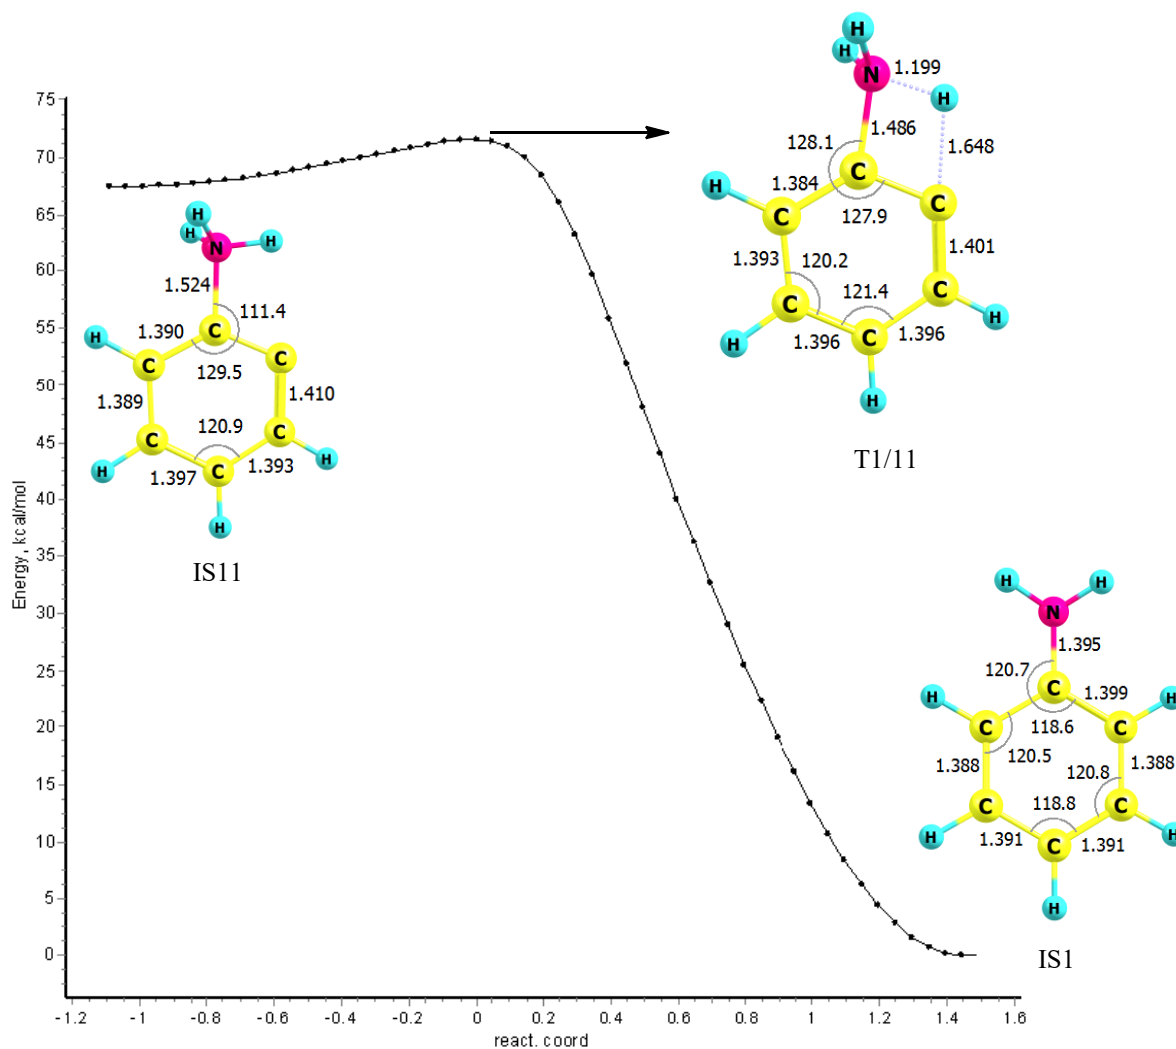

**Figure S3.** The IRC profile for the transition state T1/11 calculated at the B3LYP/6-311++G(3df,2p) level of theory.
